# 1 Culturable diversity of Arctic phytoplankton during pack ice 2 melting

3 Catherine G erikas Ribeiro<sup>1,2\*</sup>, Adriana Lopes dos Santos<sup>3,2</sup>, Priscillia Gourvil<sup>4</sup>,  
4 Florence Le Gall<sup>1</sup>, Dominique Marie<sup>1</sup>, Margot Tragin<sup>1</sup>, Ian Probert<sup>4</sup>, Daniel  
5 Vaultot<sup>1,3</sup>

6 <sup>1</sup>Sorbonne Universit , CNRS, UMR7144, Team ECOMAP, Station Biologique de Roscoff,  
7 Roscoff, France

8 <sup>2</sup>GEMA Center for Genomics, Ecology & Environment, Universidad Mayor, Camino La  
9 Pir mide, 5750, Huechuraba, Santiago, Chile

10 <sup>3</sup>Nanyang Technological University, Asian School of the Environment, Singapore.

11 <sup>4</sup>Sorbonne Universit , CNRS, FR2424, Roscoff Culture Collection, Station Biologique de  
12 Roscoff, Roscoff, France

13 \*catherine.gerikas@gmail.com

## 14 **Abstract**

15 Massive phytoplankton blooms develop at the Arctic ice edge, sometimes extend-  
16 ing far under the pack ice. An extensive culturing effort was conducted before and  
17 during a phytoplankton bloom in Baffin Bay between April and July 2016. Differ-  
18 ent isolation strategies were applied, including flow cytometry cell sorting, man-  
19 ual single cell pipetting and serial dilution. Although all three techniques yielded  
20 the most common organisms, each technique retrieved specific taxa, highlight-  
21 ing the importance of using several methods to maximize the number and diver-  
22 sity of isolated strains. More than 1,000 cultures were obtained, characterized by  
23 18S rRNA sequencing and optical microscopy and de-replicated to a subset of  
24 276 strains presented in this work. Strains grouped into 57 genotypes defined by  
25 100% 18S rRNA sequence similarity. These genotypes spread across five divi-  
26 sions: Heterokontophyta, Chlorophyta, Cryptophyta, Haptophyta and Dinophyta.  
27 Diatoms were the most abundant group (193 strains), mostly represented by the  
28 genera *Chaetoceros* and *Attheya*. The genera *Rhodomonas* and *Pyramimonas* were  
29 the most abundant non-diatom nanoplankton strains, while *Micromonas polaris*  
30 dominated the picoplankton. Diversity at the class level was higher during the  
31 peak of the bloom. Potentially new species were isolated, in particular within the  
32 genera *Navicula*, *Nitzschia*, *Coscinodiscus*, *Thalassiosira*, *Pyramimonas*, *Man-*  
33 *toniella* and *Isochrysis*.

34 Submitted to: Elementa: Science of the Anthropocene Date: May 17, 2019

## 35 Introduction

36 Polar algal communities impact (Lutz et al., 2016) and are impacted by (Brown  
37 and Arrigo, 2013) ice melting cycles. The tight links between phytoplankton di-  
38 versity/production and sea ice dynamics are beginning to be decoded and seem to  
39 be fairly complex (Arrigo et al., 2014; Olsen et al., 2017). Due to increased light  
40 availability and vertical mixing, shrinking of pack ice and the shift from thick  
41 multi-year ice to thinner first-year ice has been linked to enhanced Arctic primary  
42 production (Arrigo et al., 2008; Brown and Arrigo, 2013). However, the salinity  
43 decrease in surface waters resulting from higher ice melting rates and increased  
44 river run off leads to an increase in water column stratification which in turn may  
45 impact nutrient availability and plankton diversity (Li et al., 2009). The presence  
46 of ice-associated algae may impact the quantity (Kohlbach et al., 2016; Leu et al.,  
47 2011) and quality (Duerksen et al., 2014; Schmidt et al., 2018) of secondary pro-  
48 duction at high latitudes, as well as the recruitment of ice-associated diatoms to  
49 the water column (Kauko et al., 2018). Climate-related changes can also increase  
50 Arctic vulnerability to invasive species (Vincent, 2010) as the intrusion of warmer  
51 waters "atlantifies" the Arctic Ocean (Årthun et al., 2012) and temperate phy-  
52 toplankton move northwards, replacing Arctic communities (Neukermans et al.,  
53 2018).

54 Massive Arctic phytoplankton blooms have recently been detected not only  
55 along the ice edge (Perrette et al., 2011), but also extending large distances under  
56 the pack ice (Arrigo et al., 2012). The increasingly thin pack ice and the formation  
57 of melt-ponds allow viable areas for sub-ice bloom formation in almost one third  
58 of the ice-covered Arctic Ocean in the summer (Horvat et al., 2017).

59 The Arctic phytoplankton community exhibits strong seasonal variability  
60 (Sherr et al., 2003), with smaller organisms (picoplankton) dominating during  
61 winter and early summer, followed by diatoms during the spring bloom (Mar-  
62 quardt et al., 2016). The green alga *Micromonas* (Mamiellophyceae) is recognized  
63 as the dominant picophytoplankton (0.2 – 3  $\mu\text{m}$ ) genus during the Arctic summer  
64 (Lovejoy et al., 2007; Balzano et al., 2017). The genus *Micromonas* is widespread  
65 throughout the world oceans (Tragin and Vaultot, 2019; Worden et al., 2009) and  
66 genetically diversified (Simon et al., 2017) in relation to thermal niches (Demory  
67 et al., 2018), with one species, *Micromonas polaris*, restricted to polar regions.  
68 Another Mamiellophyceae, *Bathycoccus prasinos*, may replace *M. polaris* during  
69 polar winter (Joli et al., 2017).

70 Regarding the more diverse Arctic nano-phytoplankton, the genus *Pyrami-*  
71 *monas* has often been reported (Joli et al., 2017; Lovejoy et al., 2002) displaying  
72 high intra-generic diversity (Balzano et al., 2012; Daugbjerg and Moestrup, 1993),  
73 often associated to the sea ice (Harðardóttir et al., 2014; Kauko et al., 2018). The  
74 mamiellophyte *Mantoniella* is reported to a lesser extent in Arctic waters (Joli

75 et al., 2017; Lovejoy et al., 2007; Terrado et al., 2013), although diversity within  
76 this genus seems to be higher than other polar Mamiellophyceae (Yau et al., 2018).  
77 Other commonly observed Arctic taxa include the bloom-forming *Phaeocystis*  
78 (Assmy et al., 2017), unidentified Pelagophyceae, the mixotroph and cosmopolit-  
79 tan *Dinobryon faculiferum* and *Chlamydomonas* (Balzano et al., 2012; Crawford  
80 et al., 2018; Lovejoy et al., 2002; Terrado et al., 2013).

81 Large size classes of polar phytoplankton are dominated by diatoms and di-  
82 noflagellates (Crawford et al., 2018). Diatoms constitute a large fraction of po-  
83 lar phytoplankton communities, especially in coastal areas and during episodic  
84 upwelling (Arrigo et al., 2014; Sherr et al., 2003), impacting carbon flux to the  
85 benthic community (Booth et al., 2002). This group is particularly important dur-  
86 ing late spring/summer months in the pelagic environment (Balzano et al., 2012;  
87 Lovejoy et al., 2002), but also comprises a significant portion of protist biomass  
88 during young ice formation (Kauko et al., 2018). The genera most often reported  
89 among Arctic centric diatoms are *Chaetoceros* and *Thalassiosira* (Johnsen et al.,  
90 2018; Lovejoy et al., 2002). *Chaetoceros gelidus* and *Chaetoceros neogracilis* of-  
91 ten dominate Arctic phytoplankton assemblages (Crawford et al., 2018; Katsuki  
92 et al., 2009), although other species such as *C. decipiens* or *C. furcellatus* have also  
93 been reported (Johnsen et al., 2018; Joo et al., 2012). *Thalassiosira* is a diverse  
94 genus with both Arctic, ice-associated and subpolar/temperate water representa-  
95 tives (Luddington et al., 2016), in particular *T. nordenskiöldii* and *T. antarctica*  
96 var. *borealis* (Johnsen et al., 2018; Lovejoy et al., 2002; Poulin et al., 2011). High  
97 abundances of pennate diatoms are linked to late autumn/winter sea ice (Niemi  
98 et al., 2011) and bottom communities (Kauko et al., 2018; Leeuwe et al., 2018).  
99 The most commonly reported genera include *Cylindrotheca*, *Fragilariopsis*, *Nav-*  
100 *icula*, *Nitzschia* and *Pseudo-nitzschia* (Katsuki et al., 2009; Leeuwe et al., 2018;  
101 Poulin et al., 2011). In contrast to diatoms and small flagellates that present a  
102 strong seasonal signal, dinoflagellates are prevalent throughout the year (Comeau  
103 et al., 2011; Marquardt et al., 2016), although some taxa vary seasonally (Onda  
104 et al., 2017).

105 Few extensive, large scale culturing efforts have been carried out in the Arc-  
106 tic, with the exception of the MALINA cruise in summer 2009, which covered  
107 the Northeast Pacific Ocean, the Bering Strait, the Chukchi and Beaufort Seas  
108 (Balzano et al., 2012; 2017). As microbial communities respond to the rapid loss  
109 in Arctic ice cover and thickness (Comeau et al., 2011; Vincent, 2010), it is im-  
110 portant to continue to attempt to culture phytoplankton from the region in order to  
111 dispose of reference strains whose physiology and taxonomy can be studied in the  
112 laboratory under controlled conditions. In the present work, Baffin Bay samples  
113 from both a fixed station (Ice Camp) and an ice-breaker cruise (Amundsen) were  
114 sampled for phytoplankton isolation before, during and at the peak of the Arctic  
115 spring bloom. More than 1,000 cultures were obtained by serial dilution, single

116 cell pipetting and flow cytometry (FCM) cell sorting, characterized by partial 18S  
117 rRNA sequencing and optical microscopy and de-replicated to a subset of 276  
118 strains presented here.

## 119 **Material and Methods**

### 120 *Sampling*

121 The Green Edge project (<http://www.greenedgeproject.info>) aimed at investigat-  
122 ing the dynamics of the Arctic spring bloom at the ice edge. Samples for phyto-  
123 plankton isolation were obtained both at a fixed station (Ice Camp) and during a  
124 cruise on-board the Canadian ice breaker CCGS Amundsen.

125 The Ice Camp (IC) was set up near the Inuit village of Qikiqtarjuaq, Nunavut,  
126 in Baffin Island (67° 28' N, 63° 47' W), in a location identified to have little in-  
127 fluence from continental drainage (Figure 1). To observe the changes in the phy-  
128 toplankton community during the ice melting process, sampling was carried out  
129 between May 4<sup>th</sup> and July 18<sup>th</sup> 2016. Samples were collected in the water column  
130 under the ice at two depths three times a week and from melted ice cores once per  
131 week. The ice cores were melted at room temperature with the addition of 0.2  $\mu\text{m}$   
132 filtered sea water prior to isolation procedures.

133 The Amundsen cruise (AM) took place between June 3<sup>rd</sup> and July 14<sup>th</sup> 2016  
134 in Baffin Bay, Canada, between 60° N and 70° N. (Figure 1). Sampling transects  
135 were designed to cross the Marginal Ice Zone perpendicularly in order to observe  
136 changes in the phytoplankton community from open water to solid sea ice (Fig-  
137 ure 1). Seawater for isolation was sampled approximately every two days at two  
138 depths with Niskin bottles mounted on a CTD frame Sea-Bird SBE-911 plus.

139 The development of the spring phytoplankton bloom at the Ice Camp site was  
140 monitored by flow cytometry (Lopes dos Santos et al. *in prep*) and its phases were  
141 defined as follows: ‘pre-bloom’ from May 4 to May 23; ‘bloom-development’  
142 from May 24 to June 22 and ‘bloom-peak’ from June 23 to July 18. Amund-  
143 sen strains were not related to bloom phases due to spatial variability across the  
144 Marginal Ice Zone during sampling.

### 145 *Strain isolation and maintenance*

146 Several isolation strategies were employed in order to maximize the number  
147 and diversity of cultures retrieved. Different pre-isolation procedures were ap-  
148 plied to different samples, which included filtration, concentration and enrich-  
149 ment. In order to target the smaller plankton size fractions, samples were gravity  
150 pre-filtered with 3  $\mu\text{m}$  and 0.8  $\mu\text{m}$  filters prior to enrichment or serial dilution,  
151 as described previously (Balzano et al., 2017; Le Gall et al., 2008). Some sam-  
152 ples were concentrated with tangential flow filtration (Vivaflow Cartridge 200,  
153 Sartorius) with a 0.2  $\mu\text{m}$  polyethersulfone membrane using 2 L of seawater or



154 0.5 L of melted ice core. Enrichment was performed by mixing 25 mL of pre-  
155 filtered seawater with 1 mL of L1 (Guillard and Hargraves, 1993) or PCR-S11  
156 culture medium (Rippka et al., 2000) (media recipes at [http://roscoff-culture-  
157 collection.org/protocols/media-recipes](http://roscoff-culture-collection.org/protocols/media-recipes)). Diatom proliferation was prevented in  
158 some cultures by the addition of GeO<sub>2</sub> (Sigma-Aldrich, St-Quentin-Fallavier,  
159 France) at 9.6 μM.

160 Isolation from enriched samples was performed by single cell pipetting or by  
161 FCM cell sorting using a FACSARIA cytometer (Becton Dickinson, San José, CA,  
162 USA). In order to prevent cell damage, cells were sorted in K medium (Keller  
163 et al., 1987) with 0.01% BSA concentration as described previously (Marie et al.,  
164 2017).

165 For serial dilution either 500 or 50 μL of water sample was added to 15 mL  
166 of L1. Then, 24 wells of a Greiner Bio-One™ 96 Deep Well plate (Dominique  
167 Dustscher, Brumath, France) were filled with 0.5 mL of each dilution. Wells  
168 were later screened by optical microscopy and with a Guava® (Merck, Darm-  
169 stadt, Germany) flow cytometer. Unialgal wells were transferred to ventilated T-25  
170 CytoOne® flasks (Starlab, Orsay, France) with 15 mL of L1 media.

171 All cultures were incubated at 4° C with a 12:12 light–dark cycle and trans-  
172 ferred to new medium once a month. Light intensity was approximately 100  
173 μmole photons.m<sup>-2</sup>.s<sup>-1</sup>. The isolation method, culture medium and environmen-  
174 tal conditions for each strain are reported in Supplementary Data S1.

175 Cultures were screened and de-replicated by optical microscopy and partial  
176 18S rRNA sequences (see below). We aimed to keep, whenever possible, one  
177 strain of each taxon per sampling day and per depth. After de-replication, 416  
178 strains were added to the Roscoff Culture Collection ([http://www.roscoff-culture-  
179 collection.org](http://www.roscoff-culture-collection.org)) of which 276 were chosen to be described in this paper based on  
180 18S rRNA sequence quality and reliability of culture growth.

### 181 *Molecular analyses*

182 Strains were identified using the V4 region of the 18S rRNA gene. DNA was  
183 extracted directly from the cultures by a simple heating cycle of 95°C for  
184 five minutes, prior to PCR. A DNA extraction with NucleoSpin Plant II kit  
185 (Macherey-Nagel) was performed following the manufacturer’s instructions for  
186 thick-walled or low concentration strains. For 18S rRNA amplification the primers  
187 63F (5’-ACGCTT-GTC-TCA-AAG-ATTA-3’) and 1818R (5’-ACG-GAAACC-  
188 TTG-TTA-CGA-3’) (Lepère et al., 2011) were used. PCR amplification was per-  
189 formed in a 10 μL mix containing 5 μL of Phusion High-Fidelity PCR Master  
190 Mix® 2×, 0.3 μM final concentration of primer 63F, 0.3 μM final concentration  
191 of primer 1818R, 1 μM of DNA and H<sub>2</sub>O. Thermal conditions were: 98 ° C for 5  
192 min, followed by 35 cycles of 98 ° C for 20 s, 55 ° C for 30 s, 72 ° C for 90 s, and

193 a final cycle of 72 ° C for 5 min. For most of the cultures the 18 S rRNA gene was  
194 sequenced using the internal primer 528F (5'-CCG-CGG-TAATTC-CAG-CTC-  
195 3') (Zhu et al., 2005).

196 Partial sequences were compared with those available in Genbank using the  
197 BLAST plugin in Geneious 10 (Kearse et al., 2012). Sequences were aligned us-  
198 ing the ClustalW plugin in Geneious 10 and grouped into genotypes with 100%  
199 sequence similarity. Genotypes represented by more than one strain are listed in  
200 Supplementary Data S1. Phylogenetic trees were built using the maximum likeli-  
201 hood (ML) method with bootstrap values estimated with 1,000 replicates (Felsen-  
202 stein, 1985) using PhyML (Guindon et al., 2010) as implemented in Geneious  
203 10.

## 204 *Microscopy*

205 One strain per genotype representative of the 18S rRNA genetic diversity was cho-  
206 sen for optical light microscopy (LM). Using a Nikon Eclipse 80i (Nikon) with a  
207 100x objective and differential interference contrast, pictures of live cultures were  
208 captured with a SPOT digital camera (Diagnostics Instruments, Sterling Heights,  
209 MI, USA).

## 210 **Results**

211 In the present study, 18S rRNA gene sequences and light microscopy were used  
212 to characterize 276 Arctic strains obtained during the Green Edge campaign (Sup-  
213 plementary Data S1), 77 and 199 isolated from ice and water samples, respectively  
214 (Figure 2). By combining different pre-isolation and isolation techniques we were  
215 able to retrieve 276 strains assigned to 57 genotypes characterized by 100% sim-  
216 ilarity of partial 18S rRNA sequencing. There was a significant level of novelty  
217 within these strains since almost 60% of the representative sequences of geno-  
218 types did not match any sequence from previously cultured strains (Table 1) and  
219 more than 40% did not match any existing sequence from environmental datasets.  
220 The sequence of one strain (**RCC5319**) had only a 95.3 % match to any exist-  
221 ing sequence. Strains belonged to 5 divisions (Table 2): Heterokontophyta (208),  
222 Chlorophyta (44), Cryptophyta (16), Haptophyta (4) and Dinophyta (4). Diatoms  
223 were by far the most abundant group (193) with the genera *Chaetoceros* (42)  
224 and *Attheya* (40), followed by *Synedra* (23), *Thalassiosira* (18), Naviculales (16)  
225 and *Fragilariopsis* (17) being the most represented. The flagellates *Rhodomonas*  
226 (16) and *Pyramimonas* (24) were the most abundant non-diatom genera. With 10  
227 strains, *M. polaris* dominated picoplanktonic isolates, although one strain of *B.*  
228 *prasinus* was also isolated. Four strains of dinoflagellates assigned to *Biecheleria*  
229 sp. were retrieved from samples from the Amundsen cruise. The level of nov-  
230 elty varied between the different taxonomic groups and for some classes such as

231 Chlorophyceae and Cryptophyceae, we did not recover any strains corresponding  
232 to novel 18S rRNA sequences (Figure S1).

### 233 *Phylogenetic analysis of culture diversity*

#### 234 **Diatoms - Bacillariophyceae**

235 The *Cylindrotheca* sp. genotype represented by **RCC5463** contains two strains  
236 from ice core samples from the pre-bloom and bloom-development phases (Sup-  
237 plementary Data S1). Cells are solitary with two chloroplasts, a long apical (>  
238 35  $\mu\text{m}$ ) and short transapical axis ( $\sim 3 \mu\text{m}$ ) (Figure 3R). *Cylindrotheca* is a genus  
239 frequently observed in the Arctic, mainly represented by the cosmopolitan species  
240 complex *C. closterium* (Katsuki et al., 2009; Lovejoy et al., 2002; Poulin et al.,  
241 2011; Li et al., 2007). However, sequences from the strains obtained in this study  
242 branched apart from *C. closterium* (Figure 4), but grouped with 100% identity  
243 with an uncultured *Cylindrotheca* sequence from the Arctic (GenBank JF698839).

244 The sequence of *Cylindrotheca* sp. **RCC5216**, also isolated from an IC ice  
245 core sample (Supplementary Data S1), differed from that of *Cylindrotheca* sp.  
246 **RCC5463** by two base pairs. Cells of **RCC5216** are curved to sigmoid forming  
247 coarse aggregates, with 17-20  $\mu\text{m}$  apical and  $\sim 4 \mu\text{m}$  transapical axes (Figure 3B).

248 The *Fragilariopsis cylindrus* genotype represented by **RCC5501** groups 17  
249 strains originating from all main sampling sites, substrates and phases of the  
250 bloom (Supplementary Data S1). The 18S rRNA sequence matched with 100%  
251 similarity the Arctic *F. cylindrus* strain RCC4291 (Figure 4), a known cold-  
252 adapted diatom (Mock et al., 2017), used as an indicator of polar water and ice  
253 (Quillfeldt, 2004). Cells have a short apical axis ( $\sim 4 \mu\text{m}$ ), rounded ends, and a  
254 transapical axis of approximately 3  $\mu\text{m}$  length (Figure 3U).

255 *Navicula ramosissima* strain **RCC5373** was retrieved from an ice core sample  
256 from the pre-bloom period and shared 100% similarity with *Navicula ramosissima*  
257 strain TA439 from the Yellow Sea and *Navicula* sp. strain ECT3499 obtained from  
258 the skin of Florida manatees (Figure 4). Cells are solitary, lanceolate, with apical  
259 and transapical axes of  $\sim 25 \mu\text{m}$  and 7  $\mu\text{m}$ , respectively, two elongated chloroplasts  
260 on each side of the girdle, and large lipid bodies (Figure 3I). Interestingly, none  
261 of the *Navicula* sp. strains recovered in this study were related to previous pol-  
262 ar strains or environmental sequences, despite this genus being diverse (Katsuki  
263 et al., 2009) and abundant in the Arctic (Kauko et al., 2018; Poulin et al., 2011).

264 *Navicula* sp. strain **RCC5374** was recovered from an ice core sample from  
265 the bloom-development phase. The sequence of this strain is not very closely re-  
266 lated to those of previously reported polar *Navicula*, but is 99.2% similar to strain  
267 **RCC5373** and 99.7% similar to strain KSA2015-19 from the Red Sea (Figure 4).  
268 Cells have a  $\sim 25 \mu\text{m}$  apical axis, slightly radiating valvar striae and rostrate ends  
269 (Figure 3J).

270 The Naviculales genotype represented by **RCC5564** contains 12 strains from  
271 all phases and sampling sites (Supplementary Data S1). Its sequence is 99.7%  
272 similar to Naviculales strain CCMP2297 from northern Baffin Bay and to uncul-  
273 tured sequences from the Arctic (Figure 4). Cells have  $\sim 3 \mu\text{m}$  apical and  $5 \mu\text{m}$   
274 peralvar axes. They are solitary or form short chains (Figure 3AC).

275 The Naviculales genotype represented by **RCC5387** contains four strains from  
276 IC water and ice samples (Supplementary Data S1). Its sequence has low simi-  
277 larity to sequences from GenBank or to the genotype represented by RCC5564,  
278 sharing only 96.9% similarity with strain CCMP2297 (Naviculales) (Figure 4).  
279 Cells are elongated, mainly solitary, with up to  $6 \mu\text{m}$  apical and  $3 \mu\text{m}$  peralvar  
280 axes (Figure 3K).

281 The *Nitzschia* sp. genotype represented by **RCC5489** contains three strains  
282 from both sampling sites and substrates (Supplementary Data S1). Its sequence  
283 has no close similarity to any GenBank sequence from strains besides **RCC5390**  
284 (Figure 4). Cells are  $\sim 11 \mu\text{m}$  wide, mainly solitary or forming small aggregates  
285 (Figure 3L). Members of the genus *Nitzschia* are often reported to thrive in the  
286 Arctic (Johnsen et al., 2018; Kauko et al., 2018), *Nitzschia frigida*, for example,  
287 being considered as the single most important diatom in association with sea ice  
288 (Leu et al., 2015). Surprisingly, none of the *Nitzschia* sp. strains isolated in this  
289 study had high 18S rRNA similarity to other known polar strains. They did, how-  
290 ever, have high similarity with Arctic environmental sequences (Figure 4).

291 *Nitzschia* sp. **RCC5390** was retrieved from an IC pre-bloom sample (Supple-  
292 mentary Data S1) and its sequence is the closest to **RCC5489** (99.8% similar-  
293 ity, Figure 4). Cells have  $7 \mu\text{m}$  apical axis and  $5 \mu\text{m}$  peralvar distance, forming  
294 ribbon-like colonies (Figure 3M).

295 *Nitzschia* sp. **RCC5391** was isolated from an ice core sample during the pre-  
296 bloom period. Its sequence matches with only 97.8% similarity that of a strain  
297 TA394 (*Nitzschia paleaeformis*) from the Yellow Sea (Figure 4). Cells are solitary  
298 lanceolate with bluntly rounded apices, measuring  $\sim 10 \mu\text{m}$  and  $2 \mu\text{m}$  for the  
299 apical and transapical axes, respectively (Figure 3N).

300 *Nitzschia* sp. **RCC5458** was also retrieved from an ice sample from the pre-  
301 bloom period and its sequence is 98.1% similar to *Nitzschia* sp. strain KSA2015-  
302 49 from the Red Sea (Figure 4). Cells are linear to lanceolate and larger than  
303 other *Nitzschia* strains retrieved in this study, with an apical axis up to  $15 \mu\text{m}$   
304 (Figure 3P).

305 *Nitzschia* sp. **RCC5510** was isolated from AM waters (Supplementary  
306 Data S1). Its sequence is 98.6% similar to *Nitzschia* sp. strain KSA2015-38 from  
307 the Red Sea (Figure 4). It is the only strain from this genus recovered only from  
308 AM. Its sequence branches apart from all other *Nitzschia* sp. (Figure 4). Cells are  
309 almost round in the valvar view and rather small (apical axis  $\sim 4 \mu\text{m}$ ) compared  
310 to the other *Nitzschia* strains isolated here (Figure 3W).

311 The *Pseudo-nitzschia arctica* genotype represented by **RCC5469** contains  
312 nine strains of the recently described *P. arctica* (Percopo et al., 2016), all origi-  
313 nating from IC (Supplementary Data S1). Their sequence is 100% similar to *P.*  
314 *arctica* RCC2004 (Figure 4), a potentially endemic species with a wide distribu-  
315 tion in the Arctic (Balzano et al., 2017; Percopo et al., 2016). Only solitary cells  
316 were observed, with lanceolate shape in valvar view, measuring  $\sim 50 \mu\text{m}$  and  $3$   
317  $\mu\text{m}$  for the apical and transapical axes, respectively (Figure 3S).

318 The Bacillariophyceae genotype represented by **RCC5402** has two strains,  
319 both retrieved from IC ice cores during the pre-bloom period (Supplementary  
320 Data S1), and could not be assigned to any specific genus. Their sequence shares  
321 99.2% identity with the Bacillariophyta MBIC10102 strain from the Pacific Ocean  
322 and groups with Naviculales sequences with moderate bootstrap support (91%)  
323 (Figure 4). Cells are small  $\sim 4 \mu\text{m}$  long and  $2 \mu\text{m}$  wide, sometimes solitary, but  
324 mainly forming large aggregates (Figure 3O).

325 *Sellaphora* sp. strain **RCC5460** was retrieved during pre-bloom from an IC  
326 ice core sample. Its sequence matches with 99% similarity that of the freshwater  
327 *Sellaphora pupula* strain SM-BLCAP (Figure 4). Cells are small, with  $5 \mu\text{m}$  apical  
328 and  $4 \mu\text{m}$  perivalvar axes, solitary or forming aggregates (Figure 3Q). *S. pupula*  
329 is a species complex containing many pseudo- and semi-cryptic representatives  
330 capable of thriving in a wide range of environmental conditions (Pouličková et al.,  
331 2008). Further molecular/morphological analyses are needed to properly assign  
332 this genotype.

333 The *Synedropsis hyperborea* genotype represented by **RCC5291** contains only  
334 two strains, from both IC and AM (Supplementary Data S1). Its sequence shares  
335 100% similarity with *S. hyperborea* strain CCMP1423 (Figure 4), although mem-  
336 bers of the Fragilariaceae are not well resolved by 18S rRNA (Balzano et al.,  
337 2017). Cells are solitary or in pairs, exhibiting great variability in shape, which is  
338 attributed to vegetative cell division (Hasle et al., 1994). The apical axis is  $\sim 14$   
339  $\mu\text{m}$  (Figure 3D). *S. hyperborea* is an Arctic species with circumpolar distribution,  
340 often found in association with sea ice and as an epiphyte of *Melosira arctica*  
341 (Assmy et al., 2013; Hasle et al., 1994).

342 The *Synedra* sp. genotype represented by **RCC5535** comprises ten strains of  
343 which four were isolated from the Amundsen cruise and the other six from within  
344 or under the IC ice (Figure 4). Its sequence shares 100% identity with other Arctic  
345 strains such as Fragilariales RCC2509. Cells vary considerably in shape, from  
346 almost linear to lanceolate and sometimes asymmetrical in the valvar central area.  
347 Apical and transapical axes are  $\sim 13 \mu\text{m}$  and  $3 \mu\text{m}$ , respectively (Figure 3AA).

#### 348 **Diatoms - Coscinodiscophyceae**

349 The *Actinocyclus* sp. genotype represented by **RCC5608** comprises two strains  
350 isolated from AM waters during the bloom-peak (Supplementary Data S1). Its



351 sequence shares 100% similarity with a clone from the Arctic (EU371328), and  
352 99.8% with the *Actinocyclus* sp. MPA-2013 isolate from the Pacific Ocean (Fig-  
353 ure 5). Cells have a perivalvar axis (13-17  $\mu\text{m}$ ) longer than the valvar diameter ( $\sim$   
354 5  $\mu\text{m}$ ) and discoid chloroplasts (Figure 3AG). Although sometimes spotted in low  
355 abundance (Crawford et al., 2018; Katsuki et al., 2009), this genus may dominate  
356 phytoplankton biomass in Arctic spring blooms (Lovejoy et al., 2002).

357 *Coscinodiscus* sp. strain **RCC5319** was isolated from an IC under-ice sample  
358 at the peak of the bloom (Supplementary Data S1). The sequence is only 95%  
359 similar to that of *Coscinodiscus jonesianus* isolate 24VI12 (KJ577852) (Figure 5).  
360 Unfortunately, this strain was lost and no images are available. *Coscinodiscus* may  
361 be abundant under the ice pack (Duerksen et al., 2014) and is often reported in  
362 Arctic diversity studies (Booth et al., 2002; Lovejoy et al., 2002).

### 363 **Diatoms - Mediophyceae**

364 The *Arcocellulus* sp. genotype represented by **RCC5530** contains three strains  
365 isolated from 17 m depth from the Amundsen cruise (Supplementary Data S1).  
366 Their sequence is 100% similar to RCC2270 *Arcocellulus cornucervis* (Figure 5).  
367 However, 18S rRNA sequences do not have enough resolution to separate *Arco-*  
368 *cellulus* sp. from closer groups such as *Minutocellulus* sp. (Balzano et al., 2017),  
369 requiring further analyses for proper assignment. Cells are small ( $\sim$  5  $\mu\text{m}$ ) and  
370 solitary (Figure 3X). The cold adapted *A. cornucervis* has been reported to be part  
371 of the protist community in the Arctic (Blais et al., 2017), including in Baffin Bay  
372 in early summer (Lovejoy et al., 2002).

373 The *Attheya septentrionalis* genotype represented by **RCC5567** comprises  
374 26 strains from all substrates and sampling sites, from bloom-development and  
375 bloom-peak phases (Supplementary Data S1). Their sequence shares 100% simi-  
376 larity with the Arctic strain RCC1988 (Figure 5). Cells are lightly silicified with  
377  $\sim$ 6  $\mu\text{m}$  perivalvar axis and horns up to two times the cell length. They are either  
378 solitary or form big aggregates (Figure 3AD). *A. septentrionalis* is often reported  
379 in abundance in Arctic waters and ice (Assmy et al., 2013; Balzano et al., 2017),  
380 outcompeting pennate diatoms in high-luminosity/low nutrient conditions (Camp-  
381 bell et al., 2017).

382 The *Attheya longicornis* genotype represented by **RCC5555** contains 14  
383 strains, 11 of which were retrieved from Amundsen water samples (Supplemen-  
384 tary Data S1). Sequences are 100% identical to the Arctic *A. longicornis* strains  
385 RCC4284 and CCMP214 (Figure 5). Cells are often solitary or in short chains,  
386 with horns up to three times the length of the perivalvar axis (Figure 3AB). To-  
387 gether with *A. septentrionalis*, *A. longicornis* can comprise a significant portion  
388 of the diatom community in Arctic sea ice (Campbell et al., 2017).

389 *Bacterosira bathyomphala* strain **RCC5328** was retrieved from an ice core  
390 sample and its sequence shares 99.8% identity with the Arctic *Bacterosira* sp.



391 RCC4297 and with *B. bathyomphala* strain NB04-B6 from an estuary (Figure 5).  
392 Cells ( $\sim 9 \mu\text{m}$  perivalvar axis) form short and tight chains with contiguous valves  
393 (Figure 3F). *B. bathyomphala* is often reported in northern and polar waters  
394 (Crawford et al., 2018; Johnsen et al., 2018), especially where silicate concen-  
395 tration is high (Luddington et al., 2016).

396 The *Chaetoceros neogracilis* genotype represented by **RCC5210** contains 33  
397 strains retrieved from all sites, substrates and phases of the bloom (Supplementary  
398 Data S1). Its sequences share 100% similarity with polar *C. neogracilis* strains  
399 (e.g. RCC2506). The 18S rRNA gene does not, however, have enough resolu-  
400 tion to differentiate within *C. neogracilis* clades (Balzano et al., 2017). Cells are  
401 small, solitary or forming aggregates, with the perivalvar axis slightly longer than  
402 the valvar diameter ( $4 \mu\text{m}$ ) (Figure 3A). The genus *Chaetoceros* is abundant in  
403 temperate and polar waters (Lovejoy et al., 2002; Malviya et al., 2016) and *C.*  
404 *neogracilis* dominates the nanophytoplankton community in surface waters in the  
405 Beaufort Sea in the summer (Balzano et al., 2012).

406 The *Chaetoceros gelidus* genotype represented by **RCC5266** contains  
407 eight strains from all substrates and sampling sites, but only from the bloom-  
408 development and bloom-peak periods (Supplementary Data S1). Their sequences  
409 were 100% similar to those of the Arctic strains RCC4290 and RCC1992 (Fig-  
410 ure 5). Cells are rectangular ( $\sim 6 \mu\text{m}$ ), forming small, tight chains with narrow  
411 apertures and long inner setae, up to  $25 \mu\text{m}$  (Figure 3C). *C. gelidus* is a recently de-  
412 scribed species, previously considered as an *Chaetoceros socialis* ecotype, and is  
413 characteristic of northern temperate and polar waters (Chamnansinp et al., 2013).  
414 It is reported to form blooms (Booth et al., 2002) and can represent an important  
415 fraction of diatom abundance and biomass in Baffin Bay (Crawford et al., 2018).

416 *Chaetoceros decipiens* strain **RCC5606** was isolated from 30 meters depth in  
417 AM water (Supplementary Data S1). Its sequence is 99.8% similar to Arctic strain  
418 *C. decipiens* RCC1997 (Figure 5). Cells ( $\sim 10\text{-}30 \mu\text{m}$  apical axis) have very long  
419 inner setae ( $> 100 \mu\text{m}$ ) and form short, semi-circular colonies (Figure 3AF), which  
420 contrasts with previous morphological descriptions of *C. decipiens* (Balzano et al.,  
421 2017; Hasle and Syvertsen, 1997), indicating that it might correspond to a new  
422 genotype. This cosmopolitan species has frequently been reported in the Arctic,  
423 both in ice and open waters (Joo et al., 2012; Lovejoy et al., 2002; Johnsen et al.,  
424 2018).

425 *Eucampia groenlandica* **RCC5531** strain was retrieved from 30 m depth dur-  
426 ing the Amundsen cruise. Its sequence shares 100% similarity with *E. groen-*  
427 *landica* Arctic strain RCC2038 (Figure 5). Cells are lightly silicified with vary-  
428 ing sizes, forming straight or moderately curved colonies (Figure 3Y). *E. groen-*  
429 *landica* was first reported in Baffin Bay (Cleve, 1896) although its distribution is  
430 not constrained to the Arctic (Lee and Lee, 2012).

431 The *Shionodiscus bioculatus* genotype represented by **RCC5532** contains two

432 strains isolated from the Amundsen cruise (Supplementary Data S1). Its sequence  
433 shares 99.8% similarity with *S. bioculatus* strain RCC1991 from the Beaufort  
434 Sea (Figure 5). The morphology of the two strains differs (Figure 3Z and F1):  
435 **RCC5532** cells have a longer perivalvar axis ( $\sim 32 \mu\text{m}$ ), shorter valve diameter  
436 and fewer discoid chloroplasts in comparison to **RCC5609**. Isolates with identical  
437 18S rRNA may present cryptic diversity based on ITS divergence (Luddington  
438 et al., 2016). *S. bioculatus* is reported as dominating the top portion of submerged  
439 sea-ice ridges (Fernández-méndez et al., 2018).

440 *Skeletonema* sp. **RCC5502** strain was retrieved during the Amundsen cruise  
441 and its sequence shared 100% similarity with *S. japonicum* from Onagawa Bay  
442 and 99.7% with an Arctic environmental sequence (JF698855, Figure 5). Cells are  
443 small ( $5 \mu\text{m}$  diameter) with a very short perivalvar axis  $\sim 3 \mu\text{m}$ , being either soli-  
444 tary or in pairs (Figure 3V). The genus *Skeletonema* has been reported from high  
445 latitude, winter samples (Eilertsen and Degerlund, 2010) and *S. aff. japonicum*  
446 seems to thrive in polar environments with low silicate concentration (Luddington  
447 et al., 2016).

448 The *Thalassiosira* sp. genotype represented by **RCC5327** contains 12 strains  
449 from all sampling sites, substrates and phases of the bloom (Supplementary  
450 Data S1). The best match to its sequence is from an Arctic environmental sequence  
451 (99.5% similarity), branching apart from other *Thalassiosira* clades (Figure 5). It  
452 shares 99.2% identity with *T. nordenskiöldii* strain RCC2021. Cells are small ( $<$   
453  $8 \mu\text{m}$  diameter) with a long perivalvar dimension relative to valve size and long ( $>$   
454  $20 \mu\text{m}$ ) marginal threads (Figure 3E).

455 The *Thalassiosira* sp. genotype represented by **RCC5348** contains three  
456 strains from IC water and ice. Its sequence is 99.8% similar with a *Thalassiosira*  
457 *antarctica* var. *borealis* isolate from the Barents Sea (Figure 5). Cells are cylin-  
458 drical with a short perivalvar axis, a 17-22  $\mu\text{m}$  valvar diameter, and contain fine  
459 areolae radiating from the valve center (Figure 3G). *T. antarctica* is reported in  
460 coastal and ice-edge cold waters (Hasle and Heimdal, 1968) and associated with  
461 high-nutrient concentrations (Luddington et al., 2016).

462 The sequence of *Thalassiosira nordenskiöldii* strain **RCC5350** isolated from  
463 an ice core sample is (100%) identical to that of *T. nordenskiöldii* Arctic strain  
464 RCC2021 (Figure 5). Cells are cylindrical, either solitary or forming colonies,  
465 with a  $\sim 6 \mu\text{m}$  valvar diameter and a  $10 \mu\text{m}$  perivalvar axis, with long processes  
466 (Figure 3H). *T. nordenskiöldii* is widely distributed in North Atlantic cold, tem-  
467 perate and polar waters (Crawford et al., 2018; Johnsen et al., 2018), often asso-  
468 ciated with ice (Luddington et al., 2016).

469 The *Thalassiosira rotula* genotype represented by **RCC5605** contains two  
470 strains, one isolated during the Amundsen cruise and one from under-ice at the  
471 Ice Camp during the bloom peak (Supplementary Data S1). The sequence from  
472 this genotype had 100% similarity with those of *T. rotula* strains from the Arctic

473 and the English Channel, but also with that of *Thalassiosira gravida* (RCC1984)  
474 (Figure 5). 18S rRNA is not a good marker to discriminate between *T. rotula*, a  
475 known cosmopolitan species (Hasle and Syvertsen, 1997; Whittaker et al., 2012),  
476 and the bipolar *T. gravida* (Balzano et al., 2017). Cells are mainly solitary, with a  
477  $\sim 6 \mu\text{m}$  valvar diameter and a 10-13  $\mu\text{m}$  perivalvar axis with several long marginal  
478 threads (Figure 3AE).

#### 479 **Other Heterokontophyta**

480 *Dinobryon faculiferum* strain **RCC5261** was isolated from 1.5 m depth in IC wa-  
481 ters from the peak of the bloom (Supplementary Data S1). Its sequence shares  
482 100% similarity to those of other Arctic strains, such as RCC2294 (Figure 6B).  
483 Cells are solitary with a  $\sim 4 \mu\text{m}$  diameter lorica and long spines ( $> 25 \mu\text{m}$ ) (Fig-  
484 ure 7C). *D. faculiferum* is a frequently observed mixotroph in Arctic surface wa-  
485 ters (Balzano et al., 2012; Lovejoy et al., 2002) that can be found encysted in the  
486 top section of ice cores (Kauko et al., 2018), although it is not restricted to polar  
487 environments (Unrein et al., 2010).

488 *Spumella* sp. **RCC5513** strain isolated from an AM sample branches with *D.*  
489 *faculiferum* and its sequence is 99.8 % similar to those of *Spumella* sp. strains from  
490 the Baltic Sea (isolate IOW91) and the Atlantic Ocean (RCC4558) (Figure 6B).  
491 Cells are colorless and solitary, round or slightly elongated with 4  $\mu\text{m}$  diameter  
492 and 5  $\mu\text{m}$  flagella (Figure 7N). Heterotrophic flagellates from the genus *Spumella*  
493 have been previously reported in the Arctic (Lovejoy et al., 2006) and are mostly  
494 cold-adapted and associated with lower salinities (Grossmann et al., 2015).

495 The *Spumella* sp. genotype represented by **RCC5412** contains two isolates  
496 from IC waters. Their sequence is 100% similar to those of *Spumella* sp. isolate  
497 CCAP 955/1 from a soil sample collected in China and *Spumella elongata* isolate  
498 JBC/S24 from the UK (Figure 6B). Interestingly, these sequences are part of a  
499 soil sub-cluster within Chrysophyceae clade C with few aquatic representatives  
500 (Boenigk et al., 2005). These strains were lost and no images are available.

501 Pedinellales strain **RCC5264** was retrieved from an IC ice sample at the peak  
502 of the bloom (Supplementary Data S1) and its sequence matched with 100% sim-  
503 ilarity that of the undescribed Pedinellales Arctic strain RCC2301. Cells are soli-  
504 tary, round in anterior view (6  $\mu\text{m}$  diameter), apple-shaped to slightly elongated in  
505 side view, with six peripheral chloroplasts (Figure 7D). Further taxonomic anal-  
506 yses are needed to properly assign this strain at the genus level, although its se-  
507 quence matches with with 98.6 % similarity that of a *Pseudopedinella* sp. strain  
508 (CCMP1476) from the Sargasso Sea (Figure 6B).

509 The Pelagophyceae genotype represented by **RCC5450** groups five strains  
510 from IC, four from water samples and one from ice (Supplementary Data S1). Its  
511 sequence shares 100% similarity with other Arctic strains such as RCC2505 and  
512 RCC2515. Cells are round,  $\sim 4 \mu\text{m}$  in diameter, with two flagella of different size,

513  $\sim 2 \mu\text{m}$  and  $7 \mu\text{m}$ , respectively (Figure 7J). Pelagophyceae may dominate surface  
514 waters during the Arctic summer (Balzano et al., 2012) and yet undescribed strains  
515 have been recovered previously from northern waters (Balzano et al., 2012).

516 The Pelagophyceae genotype represented by **RCC5251** contains three strains  
517 from the peak of the bloom (Supplementary Data S1) and its representative se-  
518 quence shares 100% similarity with that of the undescribed Arctic Pelagophyceae  
519 RCC2040 (Figure 6B). Cells are elongated with  $\sim 7 \mu\text{m}$  in side view (Figure 7B).

520 Pelagophyceae strain **RCC5488**, isolated from an ice sample during bloom-  
521 development phase (Supplementary Data S1), has a sequence that branches apart  
522 from the other Pelagophyceae genotypes (Figure 6B), matching with 100% simi-  
523 larity another strain isolated from Baffin Bay, CCMP2097. Cells are solitary,  $\sim 4$   
524  $\mu\text{m}$  in size (Figure 7M).

## 525 Chlorophyta

526 The *Chlamydomonas* sp. genotype represented by **RCC5305** contains 6 strains  
527 isolated from IC water and ice samples from the peak of the bloom and is the only  
528 representative of the Chlorophyceae in our set of culture isolates (Supplementary  
529 Data S1). Its sequence is 100% identical to sequences from the *Chlamydomonas*  
530 *pulsatilla* polar strain CCCryo 038-99, but also strains from Antarctic ice and  
531 Arctic fresh water (Figure 8), all belonging to the *Polytoma* clade (Pocock et al.,  
532 2004). Cells are round or elongated,  $\sim 7 \mu\text{m}$  in diameter or  $10 \mu\text{m}$  long, respec-  
533 tively (Figure 7H). *Chlamydomonas* is a common genus found in the Arctic during  
534 the spring and summer months (Balzano et al., 2012; Lovejoy et al., 2002), that  
535 can occur in association with sea-ice (Majaneva et al., 2017).

536 *Bathycoccus prasinus* **RCC5417** strain was recovered from an IC ice core  
537 sample during bloom-development (Supplementary Data S1). This genus has re-  
538 cently been observed in Arctic waters (Kiliyas et al., 2014; Terrado et al., 2013),  
539 including during winter (Joli et al., 2017) and has a highly conserved 18S rRNA.  
540 Its sequence shares 100% similarity with *Bathycoccus prasinus* strain CCMP1898  
541 from the Mediterranean Sea (Figure 8).

542 The *Micromonas polaris* genotype represented by **RCC5239** regroups ten  
543 strains recovered from Ice Camp ice and water samples. Its sequence shares 100%  
544 similarity with those of the Arctic strains *M. polaris* CCMP2099 and RCC2308  
545 (Figure 8). *M. polaris* often dominates the picoplanktonic community in the Arctic  
546 (Not et al., 2005; Sherr et al., 2003; Balzano et al., 2012) and metagenomic data  
547 suggest its presence in Antarctic waters (Delmont et al., 2015; Simmons et al.,  
548 2015).

549 *Mantoniella baffinensis* **RCC5418**, recently described (Yau et al., 2018), was  
550 recovered from pre-bloom IC ice core samples. Its sequence branched apart from  
551 other known strains (Figure 8), matching with 98% similarity the Arctic strains  
552 RCC2497 and RCC2288 which were also recently described as *Mantoniella beau-*

553 *fortii* (Yau et al., 2018). Cells are round,  $\sim 5 \mu\text{m}$  in diameter bearing two unequal  
554 flagella with a visible red eyespot opposite to the flagella (Figure 7I).

555 *Mantoniella* sp. strain **RCC5273** was isolated from a sample taken at 20 m  
556 depth during the peak of the bloom. Its sequence shared 99.8% similarity with  
557 that of *Mantoniella squamata* strain CCAP 1965/1, a cosmopolitan species (Hasle  
558 and Syvertsen, 1997) frequently observed in the Arctic (Lovejoy et al., 2007; Ma-  
559 janeva et al., 2017). This strain was lost and no images are available.

560 *Mantoniella* sp. strain **RCC5301** was also isolated from 20 m depth during  
561 the peak of the bloom and its sequence is not closely related to any strain or  
562 environmental sequence. However, it clustered together with other *Mantoniella*  
563 sequences, sharing 98.3% identity with *M. squamata* CCAP 1965/1 (Figure 8).  
564 This strain was also lost and no images are available.

565 The *Pyramimonas diskoicola* / *Pyramimonas gelidicola* genotype represented  
566 by **RCC5525** contains 11 strains from all main sampling sites, substrates and  
567 phases of the bloom (Supplementary Data S1). The sequence from **RCC5525** is  
568 100% similar to that of the Arctic *P. diskoicola* and the Antarctic *P. gelidicola*  
569 within the subgenus *Vestigifera* (Figure 8). Three types of cell morphology have  
570 been observed: pyramidal, elongated and nearly round. A big starch grain with  
571 two lobes surrounds a pyrenoid located at the basal end; large lipid bodies are  
572 present near the apical end. Cells are  $\sim 7 \mu\text{m}$  in length and have four flagella with  
573 similar size (Figure 7Q).

574 The *Pyramimonas* sp. genotype represented by **RCC5284** contains 8 strains  
575 from the IC during the later phases of the bloom, 7 of which were isolated  
576 from water samples (Supplementary Data S1). The representative sequence shares  
577 99.7% similarity with that of *P. diskoicola* **RCC5525** (Figure 8). Cells are pyra-  
578 midal to round,  $\sim 8 \mu\text{m}$  long with a pyrenoid and basally positioned starch grain,  
579 four flagella shorter than cell length, and a flagellar pit  $\sim 2 \mu\text{m}$  deep (Figure 7G).

580 The *Pyramimonas* sp. genotype represented by **RCC5252** is formed by two  
581 IC strains from samples taken at 20 m depth at the peak of the bloom on differ-  
582 ent sampling days (Supplementary Data S1). The representative sequence is 100%  
583 similar to that of the Arctic strain *Pyramimonas* sp. RCC1987. These strains were  
584 lost and no images are available.

585 *Pyramimonas australis* **RCC5269** strain from IC water has a sequence match-  
586 ing with 100% similarity that of *P. australis* (GenBank AJ404886) from the  
587 subgenus *Trichocystis*, an Antarctic species described based on light/electron  
588 microscopy, nuclear-encoded small-subunit ribosomal DNA and chloroplast-  
589 encoded *rbcl* gene sequences, but with no representative sequence from cultures  
590 until now (Moro et al., 2002). Cells are pear-like to almost oval,  $\sim 10 \mu\text{m}$  long  
591 and  $6 \mu\text{m}$  wide with four flagella (Figure 7E).

592 *Pyramimonas* sp. **RCC5483** strain was recovered from IC surface waters dur-  
593 ing the pre-bloom phase and its sequence shares 100% similarity with that of the



594 Arctic strain RCC669 (Figure 8). This strain was lost and no images are available.

595 *Pyramimonas* sp. **RCC5453** was isolated from an IC ice core sample during  
596 the pre-bloom phase and its sequence matches with 99.7% similarity that of the  
597 Arctic strain *Pyramimonas* sp. RCC1987. Cells are pear-like to round, from 4 to  
598 7  $\mu\text{m}$  long and with four flagella (Figure 7K).

### 599 **Cryptophyta**

600 The *Rhodomonas* sp. genotype represented by **RCC5246** contains 14 strains col-  
601 lected from IC water and ice samples (Supplementary Data S1). Their representa-  
602 tive sequence matches with 100% similarity those of the *Rhodomonas* sp. strains  
603 CCMP2045 and CCMP2293, both from Baffin Bay (Figure 6A). Cells are  $\sim 10$   
604  $\mu\text{m}$  long and 5  $\mu\text{m}$  wide with a prominent pyrenoid (Figure 7A). This genus is  
605 frequently observed in Arctic waters (Lovejoy et al., 2002), being abundant in  
606 the subsurface chlorophyll maximum (Joo et al., 2012) or associated with sea-ice  
607 (Niemi et al., 2011).

608 The *Rhodomonas* sp. genotype represented by **RCC5610** groups 6 strains, 4  
609 of which were isolated from AM water samples (Supplementary Data S1). Its  
610 representative sequence has low similarity to that of **RCC5246** (96.8% ) and is  
611 100% similar to other Arctic strains such as RCC2020 and *Rhodomonas marina*  
612 SCCAP K-0435 from Denmark (Figure 6A), a species associated with sea-ice  
613 (Niemi et al., 2011). Cell length is  $\sim 18 \mu\text{m}$  with a ventral to dorsal width  $\sim 8 \mu\text{m}$ ,  
614 two flagella, and a clearly visible furrow with rows of ejectisomes (Figure 7R).

### 615 **Haptophyta**

616 *Pseudohaptolina sorokinii* strain (**RCC5270**) was retrieved from IC water during  
617 the peak of the bloom. Its sequence shares 100% similarity with that of the re-  
618 cently described *P. sorokinii* (Orlova et al., 2016) strain PsAB2015 collected from  
619 coastal, under-ice water and 99.7% with the strain *P. arctica* CCMP 1204 (Fig-  
620 ure 6C). Cells are round to oblong,  $\sim 17 \mu\text{m}$  in length and 12  $\mu\text{m}$  in width. The  
621 two flagella have almost the same length as the cell, with a shorter haptonema  
622 (Figure 7F).

623 The *Isochrysis* sp. genotype represented by **RCC5486** contains three strains,  
624 all retrieved from IC ice core samples. Their sequence shared low similarity to any  
625 other cultured strain in the GenBank database, matching with 99.1% identity the  
626 *Isochrysis nuda* strain RCC3686 and 98.8% *Isochrysis galbana* strain 24-25B5  
627 (Figure 6C). Cells are solitary, round to oval,  $\sim 6 \mu\text{m}$  long and 5  $\mu\text{m}$  wide. The  
628 nucleus, stigma and two 7  $\mu\text{m}$  flagella can be observed (Figure 7L). Although  
629 mainly isolated from coastal and estuarine environments (Bendif et al., 2013), this  
630 genus has also been reported as characteristic of sea-ice environments (Majaneva  
631 et al., 2017).



632 **Alveolata (Dinophyta)**

633 The *Biecheleria cincta* genotype represented by **RCC5518** has three strains, all  
634 from AM water samples at 20 m depth during the bloom-development phase (Sup-  
635 plementary Data S1). Sequences from this genotype are related with 100% iden-  
636 tity to the Arctic isolate RCC2013 *Biecheleria cincta* (Figure 6), a cosmopoli-  
637 tan species found also in polar waters (Balzano et al., 2012a), with reported  
638 mixotrophic behaviour (Kang et al., 2011). Cells are  $\sim 10 \mu\text{m}$  wide with irreg-  
639 ular shaped chloroplasts (Figure 7O).

640 The sequence of *Biecheleria* sp. (**RCC5522**), collected in the same sample  
641 as the *B. cincta* **RCC5518** genotype, differed by only one base pair from the se-  
642 quence of RCC5518, branching with *B. brevisulcata* strain trd276-kt from fresh-  
643 water (Figure 6). Cells are spherical to oval,  $\sim 8 \mu\text{m}$  long and  $6 \mu\text{m}$  wide with  
644 irregularly shaped chloroplasts (Figure 7P).

645 *Culture diversity according to isolation source and method*

646 **Ice Camp**

647 A total of 187 strains were isolated from Ice Camp samples, 110 from the wa-  
648 ter and 77 from the ice (Supplementary Data S1). Diatoms dominated isolates  
649 from all phases of the bloom (pre-bloom, boom-development and bloom-peak,  
650 see Material and Methods section), although the diversity and number of strains  
651 varied (Figure 9). During the pre-bloom phase, 28 strains were recovered from  
652 the ice and 10 from the water belonging to six classes (Figure 9). This phase  
653 was dominated by Bacillariophyceae, mainly *Nitzschia* sp. and *F. cylindrus* (Fig-  
654 ure 9, Supplementary Data S1). Eight out of the eleven Mediophyceae strains  
655 belonged to the genus *Thalassiosira*. Strains from Pyramimonadales, Prymnesio-  
656 phyceae, Pelagophyceae and Mamiellophyceae were also retrieved during pre-  
657 bloom. The bloom-development phase yielded 50 strains from seven classes. New  
658 taxa not isolated during the first phase appeared, including one strain of Pedinel-  
659 lales (Dictyochophyceae) from an ice sample, and 7 strains of Cryptophyceae  
660 assigned to *Rhodomonas* sp., all from water samples (Figure 9, Supplementary  
661 Data S1). More strains were retrieved during the bloom-peak than the other two  
662 phases combined (99), and eleven classes were isolated. In contrast to the previous  
663 two phases, strains retrieved from water were more diverse than from the ice (Fig-  
664 ure 9). Chlorophyceae were represented by *Chlamydomonas* sp., from both water  
665 and ice samples. One strain of the Prymnesiophyceae *P. sorokinii* and the Chrys-  
666 ophyceae strains *D. faculiferum* and *Spumella* sp. were only retrieved during this  
667 phase (Supplementary Data S1). With respect to diatoms, this phase was marked  
668 by an increase in Mediophyceae, particularly from the genera *Chaetoceros* and  
669 *Attheya* (Supplementary Data S1).

## 670 **Amundsen cruise**

671 89 strains were isolated from Amundsen cruise water samples, of which 81 were  
672 diatoms. Although some stations were dominated by Bacillariophyceae, such as  
673 station G102 (Figure S2), the majority of the strains belonged to the Medio-  
674 phyceae, particularly *Attheya* sp. and *C. neogracilis* (Supplementary Data S1).  
675 Only two strains of the Coscinodiscophyceae genus *Actinocyclus* sp. were re-  
676 covered, both from surface waters at the same station (G713). Few non-diatom  
677 strains were isolated. The only station with Cryptophyceae representatives was  
678 AM1, from which four *Rhodomonas* strains were isolated, all from the same sam-  
679 ple and with the same isolation method (Figure S2). Four Dinophyceae strains  
680 (*Biecheleria* sp.) were retrieved from station G204. One strain of *Spumella* sp.  
681 was recovered from G110 and two *Pyramimonas* sp. strains from G512 and G707  
682 (Figure S2, Supplementary Data S1).

## 683 **Isolation method**

684 Serial dilution yielded most genotypes (18), followed by FCM cell sorting (14)  
685 and single cell pipetting (7). Eighteen genotypes had representatives isolated by  
686 more than one technique (Figure S3). Among diatoms, Bacillariophyceae and  
687 Mediophyceae were retrieved by the three isolation methods, but Coscinodisco-  
688 phyceae were isolated only by single cell pipetting (Figure S4A to C). Specifically,  
689 *Arcocellulus* sp. and *E. groenlandica* were retrieved only by flow cytometry sort-  
690 ing, while *B. bathyomphala*, *Coscinodiscus* sp. and *Actinocyclus* sp. strains came  
691 only from single cell pipetting. The strains isolated only by serial dilution included  
692 *Sellaphora* sp., *Skeletonema* sp. and *Stauroneis* sp. (Supplementary Data S1). For  
693 non-diatoms, flow cytometry cell sorting was the technique which retrieved the  
694 highest diversity at the class level (Figure S4F). *D. faculiferum*, *Mantoniella* sp.,  
695 *Biecheleria* sp., and *P. sorokinii* were only obtained by this technique. *B. prasinus*,  
696 *M. baffinensis* and *Spumella* sp. were recovered only by serial dilution, as well as  
697 nine out of ten *M. polaris* strains.

## 698 **Discussion**

### 699 *Novel diversity*

700 Half of the strains in this study were retrieved using FCM cell sorting, reflecting  
701 previous reports on the efficiency of this isolation technique (Marie et al., 2017).  
702 The use of other techniques helped to increase the diversity of taxa successfully  
703 cultured, as 68% of genotypes were obtained by a single isolation method, con-  
704 firming previous work in the Arctic and other marine systems (Balzano et al.,  
705 2012; Le Gall et al., 2008). For instance, although only 12% of strains originated  
706 from single cell pipetting, Coscinodiscophyceae were only retrieved by this tech-  
707 nique, as well as three of four *Thalassiosira* genotypes. Serial dilution yielded

708 38% of the strains and was particularly successful for retrieving picoplanktonic  
709 Mamiellophyceae. In fact, at the early stages of isolate characterization (before  
710 screening and dereplication), 60 picoplankton strains were established by this  
711 technique, compared to only one by cell sorting and none by single cell pipetting.  
712 Among the genotypes retrieved by more than one isolation method were some  
713 well known Arctic taxa such as *A. septentrionalis*, *C. neogracilis* and *F. cylindrus*.

714 Of the 57 retrieved genotypes, 32 could not be assigned at the species level and  
715 6 at the genus level. Some species cannot be reliably determined by 18S rRNA se-  
716 quencing alone, like *T. rotula*, *A. cornucervis* or *C. neogracilis* that may display  
717 cryptic diversity. In such cases accurate determination would usually require the  
718 use of alternative gene markers such as 28S rRNA or ITS (Balzano et al., 2017), or  
719 there may be morphological characters that distinguish the species. For example,  
720 the closely related species *A. septentrionalis* and *A. longicornis* cannot be dis-  
721 criminated by 18S rRNA (Rampen et al., 2009), but the latter can be distinguished  
722 morphologically by its characteristic long horns.

723 Of the diversity cultured in this study, pennate diatoms contained the most  
724 candidates for novel taxa (i.e. closely related only to environmental sequences).  
725 The five genotypes affiliated to *Nitzschia* sp. were not closely related to any ex-  
726 isting sequenced strain. For example, the *Nitzschia* RCC5458 strain isolated from  
727 the ice branched apart from other *Nitzschia* genotypes with high bootstrap sup-  
728 port (95%), with only 98% similarity to a strain from the Red Sea. Also retrieved  
729 from the ice, *Cylindrotheca* RCC5303 grouped with *C. closterium* in a moderately  
730 supported clade (72%), apparently forming a new lineage within the *C. closterium*  
731 species complex (98% similarity). Other pennate diatoms with low sequence iden-  
732 tity matches to existing strains included Naviculales sp. RCC5387 and *Sellaphora*  
733 sp. RCC5460. With respect to centric diatoms, *Coscinodiscus* RCC5319 had the  
734 greatest dissimilarity to any existing strain sequence (95% identity), grouping  
735 with moderate bootstrap support (80%) with *C. radiatus* from the North Pacific, a  
736 species previously reported from Baffin Bay (Lovejoy et al., 2002). Unfortunately,  
737 this strain was lost before morphological analysis was undertaken. *C. decipiens*  
738 RCC5606 is interesting in that it is clearly distinguishable from the closely re-  
739 lated *C. decipiens* RCC1997 from the Beaufort Sea (99.8% similarity) (Balzano  
740 et al., 2017) and differs from the original description (Hasle and Syvertsen, 1997)  
741 by its prominently curved chains.

742 Among green algae, the newly described Arctic species *M. baffinensis* (from  
743 RCC5418) and *M. beaufortii* Yau et al. (2018)), as well as the other *Mantoniella*-  
744 related strains from this work that were lost (RCC5273 and RCC5301), suggest  
745 that this genus is more diverse than other Arctic Mamiellophyceae and hosts sev-  
746 eral rare species that are not often revealed in environmental sequencing data. The  
747 Mamiellophyceae *B. prasinus* (RCC5417) strain that was isolated from ice is, to  
748 the best of our knowledge, the only available Arctic isolate of this very ubiqui-

749 tous species (Tragin and Vaultot, 2019). This will offer interesting perspectives in  
750 terms of genome sequencing and physiological experiments, as this strain might  
751 correspond to a new cold-adapted ecotype.

752 The *Isochrysis* sp. strains that originated from the ice are not closely related to  
753 any polar strain or environmental sequence, potentially representing a new cold-  
754 adapted genotype. The retrieval of only one dinoflagellate species, *Biecheleria*  
755 *cincta* (previously *Woloszynskia* (Balzano et al., 2012) is at odds with the known  
756 diversity of dinoflagellates in the Arctic (Bachy et al., 2011; Onda et al., 2017) and  
757 especially in Baffin Bay (Lovejoy et al., 2002). Another extensive Arctic culture  
758 isolation effort yielded a similar result (Balzano et al., 2012), indicating the need  
759 for alternative isolation methods to overcome this bias.

### 760 *Change in diversity during bloom development*

761 The strains recovered were more numerous and more diverse during the bloom  
762 itself when sea-ice melted. During the two preliminary phases of the bloom (pre-  
763 bloom and bloom-development) the highest strain diversity originated from ice  
764 samples. A shift occurred as the bloom became established and the water column  
765 samples yielded more strain diversity. There was an increase in flagellate strains  
766 isolated from water during the bloom, going from 3 during the pre-bloom pe-  
767 riod to 33 at its peak. Flagellate dominated communities have been reported in  
768 late summer in northern Baffin Bay and the Beaufort Sea (Tremblay et al., 2009).  
769 During pre-bloom, flagellates isolated from water samples belonged to only two  
770 classes (Pelagophyceae and Pyramimonadales), compared to seven classes during  
771 later phases. *Chlamydomonas* (Chlorophyceae), a genus usually associated with  
772 freshwater environments, were only isolated in July when ice melting accelerated,  
773 lowering the salinity of surface waters. All *Micromonas* and most *Pyramimonas*  
774 strains (20 out of 24) were also isolated from the two later phases of the bloom.  
775 Both genera have been documented in abundance in lower salinity, summer Arctic  
776 waters (Balzano et al., 2012; Not et al., 2005), although higher *M. polaris* abun-  
777 dance has been associated with both pre-bloom and post-bloom stages (Marquardt  
778 et al., 2016; Meshram et al., 2017), thriving in both nutrient-replete and nutrient-  
779 deplete conditions (Balzano et al., 2012). Flow cytometry data showed a peak  
780 in picoplankton abundance preceding that of nanoplankton (Figure 9), a pattern  
781 that has previously been observed (Sherr et al., 2003). One *M. polaris* strain was  
782 retrieved from an ice core sample during bloom-development, confirming previ-  
783 ous studies using high throughput sequencing that have shown that *M. polaris* is  
784 part of both Arctic (Comeau et al., 2013) and subarctic sympagic communities  
785 (Belevich et al., 2018). *Pyramimonas* cell abundance in the Baffin Bay region  
786 during summer is exceptionally high compared to other Arctic domains such as  
787 the Bering, Chukchi and Beaufort Seas (Crawford et al., 2018), where it seems

788 to be also fairly diverse (Balzano et al., 2012). Pyramimonadales were indeed the  
789 third most represented class in the present study, from both water and ice samples.  
790 Ochrophyta strains associated with heterotrophic or mixotrophic behavior such as  
791 *Spumella*, *Dinobryon* (Unrein et al., 2010) and Pedinellales (Piwosz and Pern-  
792 thaler, 2010) were only isolated during the bloom-peak, which might be related to  
793 a competitive advantage under nitrogen deprivation in surface waters as the spring  
794 bloom develops.

795 Diatoms play a major role in sympagic assemblages (Mundy et al., 2011), and  
796 a pennate dominated community (Comeau et al., 2013) is considered a mature  
797 state of the successional stages during ice formation (Kauko et al., 2018; Niemi  
798 et al., 2011), when centric diatoms are found in lower numbers (Olsen et al., 2017).  
799 *Navicula* and *Nitzschia* representatives thrive in high abundance in the high salin-  
800 ity brine channels (Johnsen et al., 2018; Rózanska et al., 2009). In the present  
801 study, eight out of the sixteen genotypes retrieved solely from ice were pennate di-  
802 atoms, including two *Navicula* and two *Nitzschia* species. As the ice melts and the  
803 bloom develops in the Arctic pelagic environment, bigger cells prosper, including  
804 centric diatoms such as *T. nordenskiöldii*, *T. antarctica* var. *borealis* and/or the  
805 smaller-sized *C. gelidus* (Booth et al., 2002; Horvat et al., 2017). The relevance  
806 of the pelagic environment to centric diatoms was demonstrated by the Bacillar-  
807 iophyceae/Coscinodiscophyceae genera recovered solely from the water column,  
808 including *Skeletonema*, *Shionodiscus* and *Actinocyclus*. Although *Thalassiosira*  
809 strains were isolated from the first phase of the bloom, including ice samples,  
810 *C. gelidus* was only retrieved from mid-June onwards. *C. gelidus* has been often  
811 reported in the Arctic (Ardyna et al., 2017; Johnsen et al., 2018), in particular  
812 following *Thalassiosira* blooms (Booth et al., 2002). *C. neogracilis* strains alone  
813 comprised 12% of all strains and were retrieved from all phases of the bloom, from  
814 ice and surface waters down to 35 meters. The wide spatial and temporal range  
815 from which this species was retrieved attests for its ubiquity and importance in  
816 this environment.

## 817 **Conclusion**

818 Ice, under-ice and open water Arctic phytoplankton communities differ in diver-  
819 sity, biomass, growth rate and tolerance to environmental conditions (Arrigo et al.,  
820 2012). Similarly, different types of ice provide different substrates, and therefore  
821 harbor different communities (Comeau et al., 2013; Majaneva et al., 2017). The  
822 same is true for the stages of ice formation (Kauko et al., 2018; Olsen et al., 2017).  
823 In the present work, ice core samples yielded most of the novel taxa, for all groups  
824 from diatoms to green algae. It is important that culturing efforts continue in the  
825 Arctic, as ongoing and predicted loss in ice coverage and thickness (Perovich  
826 and Richter-Menge, 2009) will certainly impact plankton diversity, dynamics and



827 community structure (Blais et al., 2017; Comeau et al., 2011; Horvat et al., 2017).  
828 As the diversity within culture collections improves to reflect the complexity of  
829 the environment, the increased amount of validated reference sequences will help  
830 scientists to better access eukaryotic plankton distribution patterns across the Arc-  
831 tic. In addition, the availability of polar strains will enable experimental studies  
832 to observe physiological and metabolic impacts of current changes such as global  
833 warming on polar phytoplankton communities.

## 834 **References**

- 835 Ardyna M, Babin M, Devred E, Forest A, Gosselin M, et al. 2017. Shelf-basin gra-  
836 dents shape ecological phytoplankton niches and community composition  
837 in the coastal Arctic Ocean (Beaufort Sea). *Limnology and Oceanography*  
838 **62**(5): 2113–2132. doi:10.1002/lno.10554.
- 839 Arrigo KR, Perovich DK, Pickart RS, Brown ZW, van Dijken GL, et al. 2012.  
840 Massive Phytoplankton Blooms Under Arctic Sea Ice. *Science* **336**(6087):  
841 1408–1408. doi:10.1126/science.1215065.
- 842 Arrigo KR, Perovich DK, Pickart RS, Brown ZW, van Dijken GL, et al. 2014.  
843 Phytoplankton blooms beneath the sea ice in the Chukchi sea. *Deep Sea Re-*  
844 *search Part II: Topical Studies in Oceanography* **105**: 1–16. doi:10.1016/j.  
845 dsr2.2014.03.018.
- 846 Arrigo KR, van Dijken G, Pabi S. 2008. Impact of a shrinking Arctic ice cover on  
847 marine primary production. *Geophysical Research Letters* **35**(19): L19603.  
848 doi:10.1029/2008GL035028.
- 849 Årthun M, Eldevik T, Smedsrud LH, Skagseth Ø, Ingvaldsen RB. 2012. Quantify-  
850 ing the Influence of Atlantic Heat on Barents Sea Ice Variability and Retreat.  
851 *Journal of Climate* **25**(13): 4736–4743. doi:10.1175/JCLI-D-11-00466.1.
- 852 Assmy P, Ehn JK, Fernández-méndez M, Hop H, Katlein C, et al. 2013. Floating  
853 Ice-Algal Aggregates below Melting Arctic Sea Ice. *PLoS ONE* **8**(10): 1–13.  
854 doi:10.1371/journal.pone.0076599.
- 855 Assmy P, Fernández-Méndez M, Duarte P, Meyer A, Randelhoff A, et al. 2017.  
856 Leads in Arctic pack ice enable early phytoplankton blooms below snow-  
857 covered sea ice. *Scientific Reports* **7**: 40850. doi:10.1038/srep40850.
- 858 Bachy C, Lopez-Garcia P, Vereshchaka A, Moreira D. 2011. Diversity and vertical  
859 distribution of microbial eukaryotes in the snow , sea ice and seawater near  
860 the North Pole at the end of the polar night. *Frontiers in Microbiology* **2**:  
861 1–12. doi:10.3389/fmicb.2011.00106.
- 862 Balzano S, Gourvil P, Siano R, Chanoine M, Marie D, et al. 2012. Diversity of  
863 cultured photosynthetic flagellates in the northeast Pacific and Arctic Oceans  
864 in summer. *Biogeosciences* **9**: 4553–4571. doi:10.5194/bg-9-4553-2012.
- 865 Balzano S, Marie D, Gourvil P, Vaultot D. 2012. Composition of the summer pho-



- 866       tosynthetic pico and nanoplankton communities in the Beaufort Sea assessed  
867       by T-RFLP and sequences of the 18S rRNA gene from flow cytometry sorted  
868       samples. *The ISME journal* **6**: 1480–1498. doi:10.1038/ismej.2011.213.
- 869 Balzano S, Percopo I, Siano R, Gourvil P, Chanoine M, et al. 2017. Morphological  
870       and genetic diversity of Beaufort Sea diatoms with high contributions from  
871       the *Chaetoceros neogracilis* species complex. *Journal of Phycology* **53**: 161–  
872       187. doi:10.1111/jpy.12489.
- 873 Belevich TA, Ilyash LV, Milyutina IA, Logacheva MD, Goryunov DV, et al. 2018.  
874       Photosynthetic Picoeukaryotes in the Land-Fast Ice of the White Sea, Russia.  
875       *Microbial Ecology* **75**: 582–597. doi:10.1007/s00248-017-1076-x.
- 876 Bendif EM, Probert I, Schroeder DC, de Vargas C. 2013. On the description  
877       of *Tisochrysis lutea* gen . nov . sp . nov . and *Isochrysis nuda* sp. nov.  
878       in the Isochrysidales, and the transfer of *Dicrateria* to the Prymnesiales  
879       (Haptophyta). *Journal of Applied Phycology* **25**: 1763–1776. doi:10.1007/  
880       s10811-013-0037-0.
- 881 Blais M, Ardyna M, Gosselin M, Dumont D, Simon B, et al. 2017. Contrasting in-  
882       terannual changes in phytoplankton productivity and community structure in  
883       the coastal Canadian Arctic Ocean. *Limnology and Oceanography* **62**: 2480–  
884       2497. doi:10.1002/lno.10581.
- 885 Boenigk J, Pfandl K, Stadler P, Chatzinotas A. 2005. High diversity of the  
886       ‘*Spumella* -like’ flagellates : an investigation based on the SSU rRNA  
887       gene sequences of isolates from habitats located in six different geo-  
888       graphic regions. *Environmental Microbiology* **7**(5): 685–697. doi:10.1111/  
889       j.1462-2920.2005.00743.x.
- 890 Booth BC, Larouche P, Bélanger S, Klein B, Amiel D, et al. 2002. Dynamics of  
891       *Chaetoceros socialis* blooms in the North Water. *Deep-Sea Research Part*  
892       *II: Topical Studies in Oceanography* **49**(22-23): 5003–5025. doi:10.1016/  
893       S0967-0645(02)00175-3.
- 894 Brown ZW, Arrigo KR. 2013. Sea ice impacts on spring bloom dynamics and  
895       net primary production in the Eastern Bering Sea. *Journal of Geophysical*  
896       *Research: Oceans* **118**(1): 43–62. doi:10.1029/2012JC008034.
- 897 Campbell K, Mundy CJ, Belzile C, Delaforge A, Rysgaard S. 2017. Seasonal  
898       dynamics of algal and bacterial communities in Arctic sea ice under variable  
899       snow cover. *Polar Biology* **41**(1): 41–58. doi:10.1007/s00300-017-2168-2.
- 900 Chamnansinp A, Li Y, Lundholm N, Moestrup Ø. 2013. Global diversity of two  
901       widespread, colony-forming diatoms of the marine plankton, *Chaetoceros*  
902       *socialis* (syn. *C. radians*) and *Chaetoceros gelidus* sp. nov. *Journal of phy*  
903       **49**: 1128–1141. doi:10.1111/jpy.12121.
- 904 Cleve PT. 1896. Diatoms from Baffin Bay and Davis Strait. *Bihang till Kongliga*  
905       *Svenska Vetenskaps-Akademiens Handlingar* **22**: 1–22.
- 906 Comeau AM, Li WKW, Tremblay JE, Carmack EC, Lovejoy C. 2011. Arctic

- 907 Ocean Microbial Community Structure before and after the 2007 Record Sea  
908 Ice Minimum. *PLoS ONE* **6**(11): 1–12. doi:10.1371/journal.pone.0027492.
- 909 Comeau AM, Philippe B, Thaler M, Gosselin M, Poulin M, et al. 2013. Protists  
910 in Arctic Drift and Land-Fast Sea Ice. *Journal of Phycology* **49**(2): 229–240.  
911 doi:10.1111/jpy.12026.
- 912 Crawford DW, Cefarelli AO, Wrohan IA, Wyatt SN, Varela DE. 2018. Spatial pat-  
913 terns in abundance, taxonomic composition and carbon biomass of nano- and  
914 microphytoplankton in Subarctic and Arctic Seas. *Progress in Oceanography*  
915 **162**(October 2016): 132–159. doi:10.1016/j.pocean.2018.01.006.
- 916 Daugbjerg N, Moestrup Ø. 1993. Four new species of *Pyramimonas* (Prasino-  
917 phyceae) from arctic Canada including a light and electron microscopic de-  
918 scription of *Pyramimonas quadrifolia* sp. nov. *European Journal of Phycol-  
919 ogy* **28**: 3–16. doi:10.1080/09670269300650021.
- 920 Delmont TO, Murat Eren A, Vineis JH, Post AF. 2015. Genome reconstruc-  
921 tions indicate the partitioning of ecological functions inside a phytoplankton  
922 bloom in the Amundsen Sea, Antarctica. *Frontiers in Microbiology* **6**: 1–19.  
923 doi:10.3389/fmicb.2015.01090.
- 924 Demory D, Baudoux AC, Monier A, Simon N, Six C, et al. 2018. Picoeukaryotes  
925 of the *Micromonas* genus: sentinels of a warming ocean. *The ISME Journal*  
926 doi:10.1038/s41396-018-0248-0.
- 927 Duerksen SW, Thiemann GW, Budge SM. 2014. Large, Omega-3 Rich, Pelagic  
928 Diatoms under Arctic Sea Ice : Sources and Implications for Food Webs.  
929 *PloS one* **9**(12): 1–18. doi:10.1371/journal.pone.0114070.
- 930 Eilertsen HC, Degerlund M. 2010. Phytoplankton and light during the northern  
931 high-latitude winter. *Journal of Plankton Research* **32**(6): 899–912. doi:10.  
932 1093/plankt/fbq017.
- 933 Felsenstein J. 1985. Confidence Limits on Phylogenies : An Approach Using the  
934 Bootstrap. *Evolution* **39**(4): 783–791. doi:10.3389/fimmu.2015.00048.
- 935 Fernández-méndez M, Olsen LM, Kauko HM, Meyer A, Rösel A, et al. 2018.  
936 Algal Hot Spots in a Changing Arctic Ocean : Sea-Ice Ridges and the Snow-  
937 Ice Interface. *Frontiers in Marine Science* **5**: 1–22. doi:10.3389/fmars.2018.  
938 00075.
- 939 Grossmann L, Bock C, Schweikert M, Boenigk J. 2015. Small but Manifold –  
940 Hidden Diversity in “*Spumella* -like Flagellates”. *Journal of Eukaryotic Mi-  
941 crobiology* **0**: 1–21. doi:10.1111/jeu.12287.
- 942 Guillard RRL, Hargraves PE. 1993. *Stichochrysis immobilis* is a di-  
943 atom, not a chrysophyte. *Phycologia* **32**(3): 234–236. doi:10.2216/  
944 i0031-8884-32-3-234.1.
- 945 Guillou L, Bachar D, Audic S, Bass D, Berney C, et al. 2013. The Protist Ri-  
946 bosomal Reference database (PR<sup>2</sup>): a catalog of unicellular eukaryote Small  
947 Sub-Unit rRNA sequences with curated taxonomy. *Nucleic Acids Research*

- 948 **41(D1):** D597–D604. doi:10.1093/nar/gks1160.
- 949 Guindon S, Dufayard JF, Lefort V, Anisimova M, Hordijk W, et al. 2010. New  
950 algorithms and methods to estimate maximum-likelihood phylogenies: as-  
951 sessing the performance of PhyML 3.0. *Systematic Biology* **59**(3): 307–321.  
952 doi:10.1093/sysbio/syq010.
- 953 Harðardóttir S, Lundholm N, Moestrup Ø, Nielsen TG. 2014. Description of *Pyra-*  
954 *mimonas diskoicola* sp. nov. and the importance of the flagellate Pyrami-  
955 monas (Prasinophyceae) in Greenland sea ice during the winter–spring tran-  
956 sition. *Polar Biology* **37**(10): 1479–1494. doi:10.1007/s00300-014-1538-2.
- 957 Hasle GR, Heimdal BR. 1968. Morphology and distribution of the marine centric  
958 diatom *Thalassiosira antarctica* Comber. *Journal of the Royal Microscopical*  
959 *Society* **88**(3): 357–369.
- 960 Hasle GR, Medlin LK, Syvertsen EE. 1994. *Synedropsis* gen. nov., a genus of  
961 araphid diatoms associated with sea ice. *Phycologia* **33**(4): 248–270. doi:  
962 10.2216/i0031-8884-33-4-248.1.
- 963 Hasle GR, Syvertsen EE. 1997. Marine diatoms, in Tomas CR, ed., *Identifying*  
964 *Marine Phytoplankton*. San Diego, California: Academic Press: pp. 5–385.  
965 ISBN 9780126930184.
- 966 Horvat C, Jones DR, Iams S, Schroeder D, Flocco D, et al. 2017. The frequency  
967 and extent of sub-ice phytoplankton blooms in the Arctic Ocean. *Science*  
968 *Advances* **3**: 1–8. doi:10.1126/sciadv.1601191.
- 969 Johnsen G, Norli M, Moline M, Robbins I, von Quillfeldt C, et al. 2018. The  
970 advective origin of an under-ice spring bloom in the Arctic Ocean us-  
971 ing multiple observational platforms. *Polar Biology* **41**(6): 1197–1216. doi:  
972 10.1007/s00300-018-2278-5.
- 973 Joli N, Monier A, Logares R, Lovejoy C. 2017. Seasonal patterns in Arctic  
974 prasinophytes and inferred ecology of *Bathycoccus* unveiled in an Arctic  
975 winter metagenome. *ISME Journal* pp. 1–14. doi:10.1038/ismej.2017.7.
- 976 Joo HM, Lee SH, Jung SW, Dahms Hu, Lee JH. 2012. Latitudinal variation of  
977 phytoplankton communities in the western Arctic Ocean. *Deep-Sea Research*  
978 *Part II* **81-84**: 3–17. doi:10.1016/j.dsr2.2011.06.004.
- 979 Kang NS, Jeong HJ, Yoo YD, Yoon EY, Lee KH, et al. 2011. Mixotrophy in  
980 the newly described phototrophic dinoflagellate *Woloszynskia cincta* from  
981 western Korean waters: Feeding mechanism, prey species and Effect of prey  
982 concentration. *Journal of Eukaryotic Microbiology* **58**(2): 152–170. doi:10.  
983 1111/j.1550-7408.2011.00531.x.
- 984 Katsuki K, Takahashi K, Onodera J, Jordan RW, Suto I. 2009. Living diatoms in  
985 the vicinity of the North Pole , summer 2004. *Micropaleontology* **55**(2-3):  
986 137–170.
- 987 Kauko HM, Olsen LM, Duarte P, Peeken I, Granskog MA, et al. 2018. Algal  
988 Colonization of Young Arctic Sea Ice in Spring. *Frontiers in Marine Science*

- 989       **5**: 1–20. doi:10.3389/fmars.2018.00199.
- 990   Kearse M, Moir R, Wilson A, Stones-Havas S, Cheung M, et al. 2012. Geneious  
991       Basic: An integrated and extendable desktop software platform for the orga-  
992       nization and analysis of sequence data. *Bioinformatics* **28**(12): 1647–1649.  
993       doi:10.1093/bioinformatics/bts199.
- 994   Keller MD, Selvin RC, Claus W, Guillard RRL. 1987. Media for the culture of  
995       oceanic ultraphytoplankton. *Journal of Phycology* **23**(4): 633–638. doi:10.  
996       1111/j.1529-8817.1987.tb04217.x.
- 997   Kilias ES, Nöthig EM, Wolf C, Metfies K. 2014. Picoeukaryote plankton compo-  
998       sition off West Spitsbergen at the entrance to the Arctic Ocean. *The Journal*  
999       *of eukaryotic microbiology* **0**: 1–11. doi:10.1111/jeu.12134.
- 1000   Kohlbach D, Graeve M, A Lange B, David C, Peeken I, et al. 2016. The impor-  
1001       tance of ice algae-produced carbon in the central Arctic Ocean ecosystem:  
1002       Food web relationships revealed by lipid and stable isotope analyses. *Lim-*  
1003       *nology and Oceanography* **61**: 2027–2044. doi:10.1002/lno.10351.
- 1004   Le Gall F, Rigaut-Jalabert F, Marie D, Garczarek L, Viprey M, et al. 2008. Pi-  
1005       coplankton diversity in the South-East Pacific Ocean from cultures. *Biogeo-*  
1006       *sciences* **5**: 203–214. doi:10.5194/bg-5-203-2008.
- 1007   Lee JM, Lee JH. 2012. Morphological study of the genus *Eucampia* (Bacillario-  
1008       phyceae) in Korean coastal waters. *Algae* **27**(4): 235–247. doi:10.4490/algae.  
1009       2012.27.4.235.
- 1010   Leeuwe MAV, Tedesco L, Arrigo KR, Assmy P, Meiners KM, et al. 2018. Microal-  
1011       gal community structure and primary production in Arctic and Antarctic sea  
1012       ice : A synthesis. *Elementa* **6**(4): 1–25.
- 1013   Lepère C, Demura M, Kawachi M, Romac S, Probert I, et al. 2011. Whole-  
1014       genome amplification (WGA) of marine photosynthetic eukaryote popula-  
1015       tions. *FEMS Microbiology Ecology* **76**: 513–523. doi:10.1111/j.1574-6941.  
1016       2011.01072.x.
- 1017   Leu E, Mundy CJ, Assmy P, Campbell K, Gabrielsen TM, et al. 2015. Arctic  
1018       spring awakening - Steering principles behind the phenology of vernal ice al-  
1019       gal blooms. *Progress in Oceanography* **139**: 151–170. doi:10.1016/j.pocean.  
1020       2015.07.012.
- 1021   Leu E, Søreide JE, Hessen DO, Falk-Petersen S, Berge J. 2011. Consequences of  
1022       changing sea-ice cover for primary and secondary producers in the European  
1023       Arctic shelf seas: Timing, quantity, and quality. *Progress in Oceanography*  
1024       **90**: 18–32. doi:10.1016/j.pocean.2011.02.004.
- 1025   Li H, Yang G, Sun Y, Wu S, Zhang X. 2007. *Cylindrotheca closterium* is  
1026       a species complex as was evidenced by the variations of rbcL gene and  
1027       SSU rDNA. *Journal of Ocean University of China* **6**(2): 167–174. doi:  
1028       10.1007/s11802-007-0167-6.
- 1029   Li WK, McLaughlin FA, Lovejoy C, Carmack EC. 2009. Smallest algae thrive as

- 1030 the arctic ocean freshens. *Science* **326**: 539. doi:10.1126/science.1179798.
- 1031 Lovejoy C, Legendre L, Martineau MJ, Bâcle J, Von Quillfeldt CH. 2002. Dis-  
1032 tribution of phytoplankton and other protists in the North Water. *Deep-Sea*  
1033 *Research Part II: Topical Studies in Oceanography* **49**: 5027–5047. doi:  
1034 10.1016/S0967-0645(02)00176-5.
- 1035 Lovejoy C, Massana R, Pedro C. 2006. Diversity and Distribution of Marine Mi-  
1036 crobial Eukaryotes in the Arctic Ocean and Adjacent Seas. *Applied and En-  
1037 vironmental Microbiology* **72**(5): 3085–3095. doi:10.1128/AEM.72.5.3085.
- 1038 Lovejoy C, Vincent WF, Bonilla S, Roy S, Martineau MJ, et al. 2007. Distribu-  
1039 tion, phylogeny, and growth of cold-adapted picoprasinophytes in arctic seas.  
1040 *Journal of Phycology* **43**(1): 78–89. doi:10.1111/j.1529-8817.2006.00310.x.
- 1041 Luddington IA, Lovejoy C, Kaczmarek I, Moisan P. 2016. Species-rich meta-  
1042 communities of the diatom order Thalassiosirales in the Arctic and northern  
1043 Atlantic Ocean. *Journal of Plankton Research* **38**(4): 781–797. doi:10.1093/  
1044 plankt/fbw030.
- 1045 Lutz S, Anesio AM, Raiswell R, Edwards A, Newton RJ, et al. 2016. The bio-  
1046 geography of red snow microbiomes and their role in melting arctic glaciers.  
1047 *Nature Communications* **7**: 1–9. doi:10.1038/ncomms11968.
- 1048 Majaneva M, Blomster J, Müller S, Autio R, Majaneva S, et al. 2017. Sea-ice  
1049 eukaryotes of the Gulf of Finland, Baltic Sea, and evidence for herbivory on  
1050 weakly shade-adapted ice algae. *European Journal of Protistology* **57**: 1–15.  
1051 doi:10.1016/j.ejop.2016.10.005.
- 1052 Malviya S, Scalco E, Audic S, Vincent F, Veluchamy A, et al. 2016. Insights into  
1053 global diatom distribution and diversity in the world's ocean. *Proceedings*  
1054 *of the National Academy of Sciences* **348**(6237): 1–10. doi:10.1073/pnas.  
1055 1509523113.
- 1056 Marie D, Le Gall F, Edern R, Gourvil P, Vaultot D. 2017. Improvement of phyto-  
1057 plankton culture isolation using single cell sorting by flow cytometry. *Journal*  
1058 *of Phycology* **53**(2): 271–282.
- 1059 Marquardt M, Vader A, Stübner EI, Reigstad M, Gabrielsen TM. 2016. Strong  
1060 Seasonality of Marine Microbial Eukaryotes in a High-Arctic Fjord (Isfjor-  
1061 den, in West Spitsbergen, Norway). *Applied and Environmental Microbiol-  
1062 ogy* **82**(6): 1868–1880. doi:10.1128/AEM.03208-15.Editor.
- 1063 Meshram AR, Vader A, Kristiansen S, Gabrielsen TM. 2017. Microbial Eukary-  
1064 otes in an Arctic Under-Ice Spring Bloom North of. *Frontiers in Microbiol-  
1065 ogy* **8**: 1–12. doi:10.3389/fmicb.2017.01099.
- 1066 Mock T, Robert P, Strauss J, McMullan M, Paajanen P, et al. 2017. Evolutionary  
1067 genomics of the cold-adapted diatom *Fragilariopsis cylindrus*. *Nature* **541**:  
1068 536–540. doi:10.1038/nature20803.
- 1069 Moro I, Rocca NL, Valle LD, Moschin E, Negrisolo E, et al. 2002. *Pyramimonas*  
1070 *australis* sp. nov. (Prasinophyceae, Chlorophyta) from Antarctica: fine struc-



- 1071       ture and molecular phylogeny. *European Journal of Phycology* **37**: 103–114.
- 1072 Mundy CJ, Gosselin M, Ehn JK, Belzile C, Poulin M, et al. 2011. Charac-  
1073       teristics of two distinct high-light acclimated algal communities during  
1074       advanced stages of sea ice melt. *Polar Biology* **34**(12): 1869–1886. doi:  
1075       10.1007/s00300-011-0998-x.
- 1076 Neukermans G, Oziel L, Babin M. 2018. Increased intrusion of warming Atlantic  
1077       waters leads to rapid expansion of temperate phytoplankton in the Arctic.  
1078       *Global Change Biology* pp. 1–9. doi:10.1111/gcb.14075.
- 1079 Niemi A, Michel C, Hille K, Poulin M. 2011. Protist assemblages in winter sea  
1080       ice: setting the stage for the spring ice algal bloom. *Polar Biology* **34**: 1803–  
1081       1817. doi:10.1007/s00300-011-1059-1.
- 1082 Not F, Massana R, Latasa M, Marie D, Colson C, et al. 2005. Late summer com-  
1083       munity composition and abundance of photosynthetic picoeukaryotes in Nor-  
1084       wegian and Barents Seas. *Limnology and Oceanography* **50**(5): 1677–1686.
- 1085 Olsen LM, Laney SR, Duarte P, Kauko HM, Fernández-méndez M, et al. 2017.  
1086       The multiyear ice seed repository hypothesis. *Journal of Geophysical Re-  
1087       search: Biogeosciences* **122**: 1529–1548. doi:10.1002/2016JG003668.
- 1088 Onda DFL, Medrinal E, Comeau AM, Thaler M, Babin M, et al. 2017. Seasonal  
1089       and Interannual Changes in Ciliate and Dinoflagellate Species Assemblages  
1090       in the Arctic Ocean (Amundsen Gulf, Beaufort Sea, Canada). *Frontiers in  
1091       Marine Science* **4**(January). doi:10.3389/fmars.2017.00016.
- 1092 Orlova TY, Efimova KV, Stonik IV. 2016. Morphology and molecular phylogeny  
1093       of *Pseudohaptolina sorokinii* sp. nov. (Prymnesiales, Haptophyta) from the  
1094       Sea of Japan, Russia. *Phycologia* **55**(5): 506–514. doi:10.2216/15-107.1.
- 1095 Percopo I, Ruggiero M, Balzano S, Gourvil P, Lundhölml N, et al. 2016. *P. arc-*  
1096       *tica* sp. nov., a new cold-water cryptic *Pseudo-nitzschia* species within the *P.*  
1097       *pseudodelicatissima* complex. *Journal of Phycology* **52**: 184–199.
- 1098 Perovich DK, Richter-Menge JA. 2009. Loss of Sea Ice in the Arctic. *Annual Re-*  
1099       *view of Marine Science* **1**(1): 417–441. doi:10.1146/annurev.marine.010908.  
1100       163805.
- 1101 Perrette M, Yool A, Quartly GD, Popova EE. 2011. Near-ubiquity of ice-  
1102       edge blooms in the Arctic. *Biogeosciences* **8**: 515–524. doi:10.5194/  
1103       bg-8-515-2011.
- 1104 Piwosz K, Pernthaler J. 2010. Seasonal population dynamics and trophic role of  
1105       planktonic nanoflagellates in coastal surface waters of the Southern Baltic  
1106       Sea. *Environmental Microbiology* **12**(2): 364–377. doi:10.1111/j.1462-2920.  
1107       2009.02074.x.
- 1108 Pockock T, Lachance MA, Proschold T, Priscu JC, Kim SS, et al. 2004. Identifi-  
1109       cation of a psychrophilic green alga from Lake Bonney Antarctica: *Chlamy-*  
1110       *domonas raudensis* ettl. (UWO 241) Chlorophyceae. *Journal of Phycology*  
1111       **40**: 1138–1148. doi:10.1111/j.1529-8817.2004.04060.x.



- 1112 Poulíčková A, Špačková J, Kelly MG, Duchoslav M, Mann DG. 2008. Eco-  
1113 logical variation within *Sellaphora* species complexes (Bacillariophyceae):  
1114 Specialists or generalists? *Hydrobiologia* **614**(1): 373–386. doi:10.1007/  
1115 s10750-008-9521-y.
- 1116 Poulin M, Daugbjerg N, Gradinger R, Ilyash L, Ratkova T, et al. 2011. The  
1117 pan-Arctic biodiversity of marine pelagic and sea-ice unicellular eukary-  
1118 otes : a first-attempt assessment. *Marine Biodiversity* **41**(1): 13–28. doi:  
1119 10.1007/s12526-010-0058-8.
- 1120 Quillfeldt CHV. 2004. The diatom *Fragilariopsis cylindrus* and its potential as an  
1121 indicator species for cold water rather than for sea ice. *Vie et Milieu* **54**(2-3):  
1122 137–143.
- 1123 Rampen SW, Schouten S, Elda Panoto F, Brink M, Andersen RA, et al. 2009. Phy-  
1124 logenetic Position of *Attheya longicornis* and *Attheya septentrionalis* (Bacil-  
1125 lariophyta). *Journal of Phycology* **45**(2): 444–453. doi:10.1111/j.1529-8817.  
1126 2009.00657.x.
- 1127 Rippka R, Coursin T, Hess W, Lichtle C, Scanlan DJ, et al. 2000. *Prochlorococcus*  
1128 *marinus* Chisholm et al. 1992 subsp. *pastoris* subsp. nov. strain PCC 9511,  
1129 the first axenic chlorophyll a2/b2-containing cyanobacterium (Oxyphotobac-  
1130 teria). *International Journal of Systematic and Evolutionary Microbiology*  
1131 **50**: 1833–1847. doi:10.1099/00207713-50-5-1833.
- 1132 Rózanska M, Gosselin M, Poulin M, Wiktor JM, Michel C. 2009. Influence of  
1133 environmental factors on the development of bottom ice protist communities  
1134 during the winter – spring transition. *Marine Ecology Progress Series* **386**:  
1135 43–59. doi:10.3354/meps08092.
- 1136 Schmidt K, Brown T, Belt S, Ireland L, Taylor KW, et al. 2018. Do pelagic graz-  
1137 ers benefit from sea ice? Insights from the Antarctic sea ice proxy IPSO25.  
1138 *Biogeosciences* **15**: 1987–2006. doi:10.5194/bg-15-1987-2018.
- 1139 Sherr EB, Sherr BF, Wheeler PA, Thompson K. 2003. Temporal and spatial vari-  
1140 ation in stocks of autotrophic and heterotrophic microbes in the upper water  
1141 column of the central Arctic Ocean. *Deep-Sea Research Part I: Oceanog-  
1142 raphic Research Papers* **50**(5): 557–571. doi:10.1016/S0967-0637(03)  
1143 00031-1.
- 1144 Simmons MP, Bachy C, Sudek S, Van Baren MJ, Sudek L, et al. 2015. Intron inva-  
1145 sions trace algal speciation and reveal nearly identical arctic and antarctic mi-  
1146 cromonas populations. *Molecular Biology and Evolution* **32**(9): 2219–2235.  
1147 doi:10.1093/molbev/msv122.
- 1148 Simon N, Foulon E, Grulois D, Six C, Desdevises Y, et al. 2017. Revision of  
1149 the Genus *Micromonas* Manton et Parke (Chlorophyta, Mamiellophyceae),  
1150 of the Type Species *M. pusilla* (Butcher) Manton & Parke and of the Species  
1151 *M. commoda* van Baren, Bachy and Worden and Description of two New  
1152 Species Based on the Genetic and Phenotypic Characterization of Cultured

- 1153 Isolates. *Protist* **168**(5): 612–635. doi:10.1016/j.protis.2017.09.002.
- 1154 Terrado R, Scarcella K, Thaler M, Vincent WF, Lovejoy C. 2013. Small phyto-  
1155 plankton in Arctic seas : vulnerability to climate change. *Biodiversity* **14**(1):  
1156 2–18.
- 1157 Tragin M, Vaultot D. 2019. Novel diversity within marine Mamiellophyceae  
1158 (Chlorophyta) unveiled by metabarcoding. *Scientific Reports* **9**(1): 5190. doi:  
1159 10.1038/s41598-019-41680-6.
- 1160 Tremblay G, Belzile C, Gosselin M, Poulin M, Roy S, et al. 2009. Late sum-  
1161 mer phytoplankton distribution along a 3500 km transect in Canadian Arctic  
1162 waters: Strong numerical dominance by picoeukaryotes. *Aquatic Microbial*  
1163 *Ecology* **54**(1): 55–70. doi:10.3354/ame01257.
- 1164 Unrein F, Gasol JM, Massana R. 2010. *Dinobryon faculiferum* (Chrysophyta) in  
1165 coastal Mediterranean seawater: Presence and grazing impact on bacteria.  
1166 *Journal of Plankton Research* **32**(4): 559–564. doi:10.1093/plankt/fbp150.
- 1167 Vincent WF. 2010. Microbial ecosystem responses to rapid climate change in the  
1168 Arctic. *ISME Journal* **4**(9): 1089–1091. doi:10.1038/ismej.2010.108.
- 1169 Whittaker KA, Rignanes DR, Olson RJ, Rynearson TA. 2012. Molecular subdivi-  
1170 sion of the marine diatom *Thalassiosira rotula* in relation to geographic dis-  
1171 tribution, genome size, and physiology. *BMC Evolutionary Biology* **12**(209):  
1172 2–14. doi:10.1186/1471-2148-12-209.
- 1173 Worden AZ, Lee JH, Mock T, Rouz  P, Simmons MP, et al. 2009. Green evolution  
1174 and dynamic adaptations revealed by genomes of the marine picoeukaryotes  
1175 *Micromonas*. *Science* **324**: 268–272.
- 1176 Yau S, Lopes dos Santos A, Eikrem W, G&acuterikas Ribero C, Gourvil  
1177 P, et al. 2018. *Mantoniella beaufortii* and *Mantoniella baffinensis* sp. nov.  
1178 (Mamiellales, Mamiellophyceae), two new green algal species from the high  
1179 Arctic. *bioRxiv* doi:10.1101/506915.
- 1180 Zhu F, Massana R, Not F, Marie D, Vaultot D. 2005. Mapping of picoeucaryotes  
1181 in marine ecosystems with quantitative PCR of the 18S rRNA gene. *FEMS*  
1182 *Microbiology Ecology* **52**: 79–92. doi:10.1016/j.femsec.2004.10.006.

## 1183 Contributions

- 1184 Contributed to conception and design: DV, ALS, IP  
1185 Contributed to acquisition of data: CGR, ALS, PG,FLG, DM, MT, IP, DV  
1186 Contributed to analysis and interpretation of data: CGR, ALS, DV  
1187 Drafted and/or revised the article: CGR, ALS, IP, DV  
1188 Approved the submitted version for publication: CGR, ALS, DV

1189 **Acknowledgments**

1190 We thank the whole Green Edge team, as well as the Amundsen crew, for the help  
1191 they provided at all stages of this project. Special thanks to Marie-Hélène Forget  
1192 and Joannie Ferland for the Ice Camp logistics.

1193 **Funding information**

1194 Financial support for this work was provided by the Green Edge project (ANR-  
1195 14-CE01-0017, Fondation Total), the ANR PhytoPol (ANR-15-CE02-0007) and  
1196 TaxMArc (Research Council of Norway, 268286/E40). M.T. was supported by  
1197 a PhD fellowship from the Université Pierre et Marie Curie and the Région Bre-  
1198 tagne (ARED GreenPhy). ALS was supported by FONDECYT grant PiSCOSouth  
1199 (N1171802). CGR was supported by CONICYT project 3190827.

1200 **Competing interests**

1201 The authors have no competing interests, as defined by Elementa, that might be  
1202 perceived to influence the research presented in this manuscript.

1203 **Data accessibility statement**

1204 Strains have been deposited to the Roscoff Culture Collection  
1205 (<http://www.roscoff-culture-collection.org>) under numbers RCC5197  
1206 to RCC5612 and sequences to Genbank under accession numbers  
1207 MH764681:765044.

**Table 1. Level of novelty of the different genotypes based on BLAST analysis of 18S rRNA against Genbank nr database (Supplementary Data S2).**

| Genotype novelty <sup>1</sup> | Number of genotypes |
|-------------------------------|---------------------|
| cultured                      | 24                  |
| detected - uncultured         | 9                   |
| undetected                    | 24                  |

<sup>1</sup> "cultured" corresponds to genotypes which 18S rRNA sequence is 100% similar to that of a culture that has been isolated previously, "detected - uncultured" correspond to genotypes which 18S rRNA sequence is 100% similar to that of a sequence detected in the environment but for which no culture existed prior to this work and "undetected" corresponds to genotypes for which no 100 % similar 18S rRNA sequence had been detected previously in the environment.

**Table 2. Number of strains obtained from water and ice samples for each genus**

| Division             | Genus                   | water | ice |
|----------------------|-------------------------|-------|-----|
| Chlorophyta          | <i>Bathycoccus</i>      |       | 1   |
|                      | <i>Chlamydomonas</i>    | 4     | 2   |
|                      | <i>Mantoniella</i>      | 2     | 1   |
|                      | <i>Micromonas</i>       | 9     | 1   |
|                      | <i>Pyramimonas</i>      | 17    | 7   |
| Cryptophyta          | <i>Rhodomonas</i>       | 14    | 2   |
| Dinophyta            | <i>Biecheleria</i>      | 4     |     |
| Haptophyta           | <i>Isochrysis</i>       |       | 3   |
|                      | <i>Pseudohaptolina</i>  | 1     |     |
| Heterokontophyta     | <i>Actinocyclus</i>     | 2     |     |
|                      | <i>Arcocellulus</i>     | 3     |     |
|                      | <i>Attheya</i>          | 27    | 13  |
|                      | <i>Bacterosira</i>      |       | 1   |
|                      | <i>Chaetoceros</i>      | 36    | 6   |
|                      | <i>Coscinodiscus</i>    | 1     |     |
|                      | <i>Cylindrotheca</i>    |       | 3   |
|                      | <i>Dinobryon</i>        | 1     |     |
|                      | <i>Eucampia</i>         | 1     |     |
|                      | <i>Fragilariopsis</i>   | 14    | 3   |
|                      | <i>Navicula</i>         |       | 2   |
|                      | Naviculales             | 10    | 6   |
|                      | <i>Nitzschia</i>        | 4     | 3   |
|                      | Pedinellales            |       | 1   |
|                      | Pelagophyceae           | 6     | 4   |
|                      | <i>Pseudo nitzschia</i> | 8     | 1   |
|                      | <i>Sellaphora</i>       |       | 1   |
|                      | <i>Shionodiscus</i>     | 2     |     |
|                      | <i>Skeletonema</i>      | 1     |     |
|                      | <i>Spumella</i>         | 3     |     |
| <i>Stauroneis</i>    |                         | 2     |     |
| <i>Synedra</i>       | 18                      | 5     |     |
| <i>Synedropsis</i>   | 1                       | 1     |     |
| <i>Thalassiosira</i> | 10                      | 8     |     |



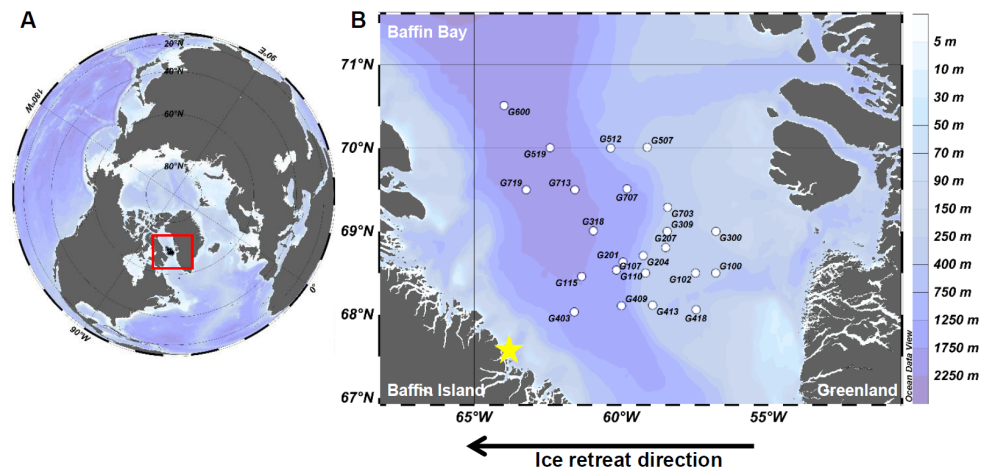

**Figure 1. Sampling stations.**

Sampling stations where phytoplankton strains were retrieved. A) Sampling region (red square). B) The yellow star indicates the location of the Green Edge Ice Camp (IC) ( $67.48^{\circ}$  N,  $-63.79^{\circ}$  W); Amundsen (AM) cruise stations are marked by white dots; black arrow indicates the ice retreat direction during the melting process.

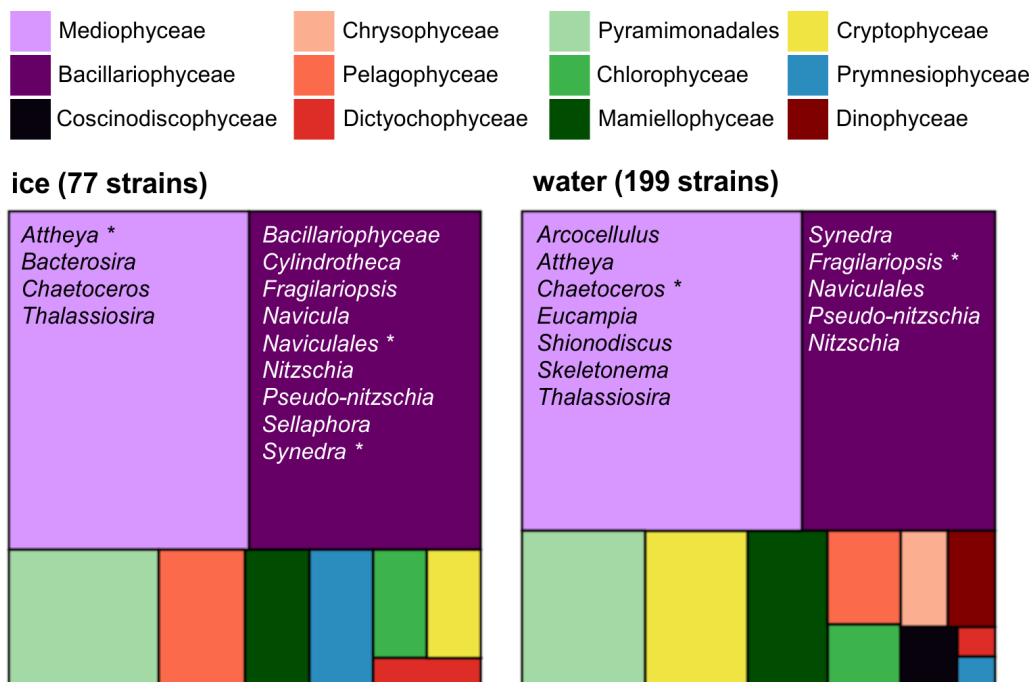

**Figure 2. Overall diversity of strains.**

Overall diversity of the strains retrieved from ice and water samples assigned at the class level. Diatoms genera and most abundant strains are marked with as asterisk.

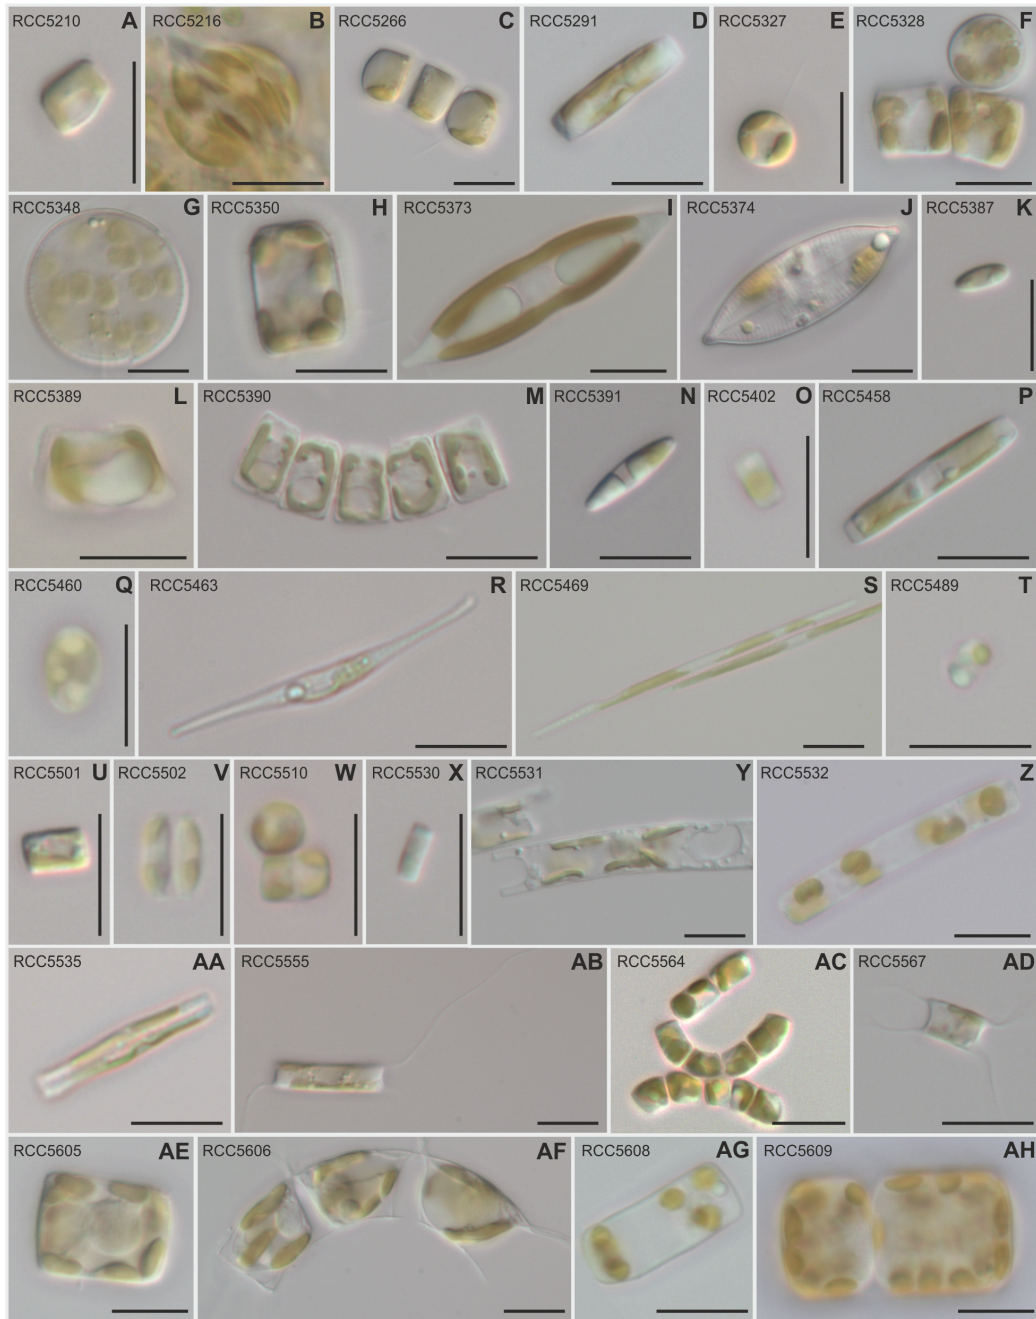

**Figure 3. Light microscopy images of diatom strains - see legend on next page.**

1208 **Legend of Figure 3:** Light microscopy images from diatoms strains retrieved during  
1209 Green Edge 2016 campaign. Size bars correspond to 10  $\mu\text{m}$ . **A)** *Chaetoceros neogracilis*  
1210 strain RCC5210; **B)** *Cylindrotheca* sp. strain RCC5216; **C)** *Chaetoceros gelidus* strain  
1211 RCC5266 forming a small chain; **D)** *Synedropsis hyperborea* strain RCC5291; **E)** *Tha-*  
1212 *lassiosira* sp. strain RCC5327; **F)** *Bacterosira bathyomphala* strain RCC5328 in both  
1213 girdle and valve view; **G)** *Thalassiosira* cf. *antarctica* strain RCC5348 valve with fine  
1214 radiating areolae; **H)** *Thalassiosira* sp. strain RCC5350 in girdle view; **I)** *Navicula* sp.  
1215 strain RCC5373; **J)** *Navicula ramosissima* strain RCC5374; **K)** Naviculales sp. RCC5387  
1216 cell in valve view; **L)** *Nitzschia* sp. strain RCC5389; **M)** *Nitzschia* sp. RCC5390 cells  
1217 in ribbon-like colonies; **N)** *Nitzschia* sp. strain RCC5391; **O)** Bacillariophyceae strain  
1218 RCC5402; **P)** *Nitzschia* sp. strain RCC5458; **Q)** *Sellaphora* sp. strain RCC5460; **R)** *Cylin-*  
1219 *drotheca* sp. strain RCC5463; **S)** *Pseudo-nitzschia arctica* strain RCC5469; **T)** *Nitzschia*  
1220 sp. strain RCC5489; **U)** *Fragilariopsis cylindrus* strain RCC5501; **V)** *Skeletonema* sp.  
1221 strain RCC5502; **W)** *Nitzschia* sp. strain RCC5510; **X)** *Arcocellulus* sp. strain RCC5530;  
1222 **Y)** *Eucampia groenlandica* strain RCC5531; **Z)** *Shionodiscus bioculatus* strain RCC5532;  
1223 **AA)** *Synedra* sp. strain RCC5535; **AB)** *Attheya longicornis* strain RCC5555 solitary cell  
1224 in girdle view; **AC)** Naviculales sp. RCC5564 forming a small chain; **AD)** *Attheya septen-*  
1225 *trionalis* strain RCC5567; **AE)** *Thalassiosira rotula* RCC5605; **AF)** *Chaetoceros decipi-*  
1226 *ens* strain RCC5606 forming a small, curved chain; **AG)** *Actinocyclus* sp. RCC5608; **AH)**  
1227 *Shionodiscus bioculatus* strain RCC5609.

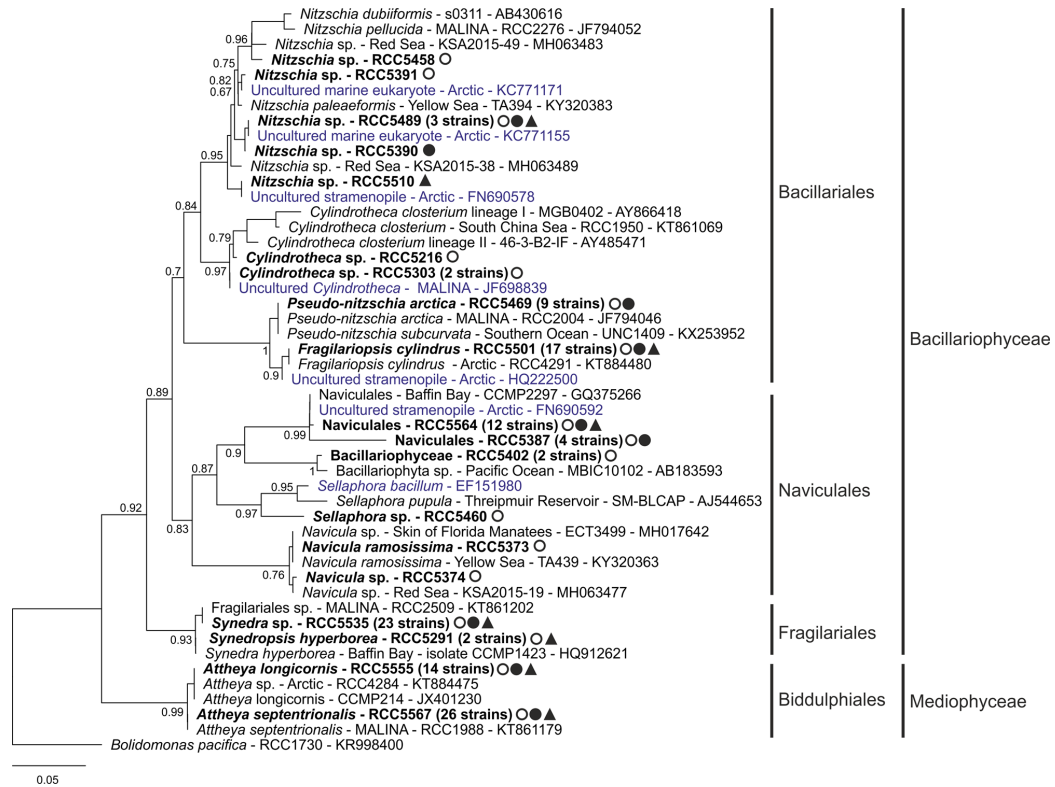

**Figure 4. 18S rRNA phylogenetic tree of pennate diatoms.**

18S rRNA phylogenetic tree inferred by maximum likelihood (ML) analysis for pennate diatom strains obtained during the Green Edge campaign (in bold), using an alignment of 59 sequences with 406 positions. Circles mark strains retrieved from the Ice Camp ice (open) and water samples (solid); triangles (solid) mark Amundsen cruise water samples. The origin, sampling substrate and phase of the bloom from which they were recovered are provided along with their names and RCC code in Supplementary Data S1. When one genotype is represented by more than one strain, the number of strains is indicated between parenthesis. For the reference sequences, the strain (whenever available) and the Genbank ID number are displayed. Environmental sequences are marked in blue.





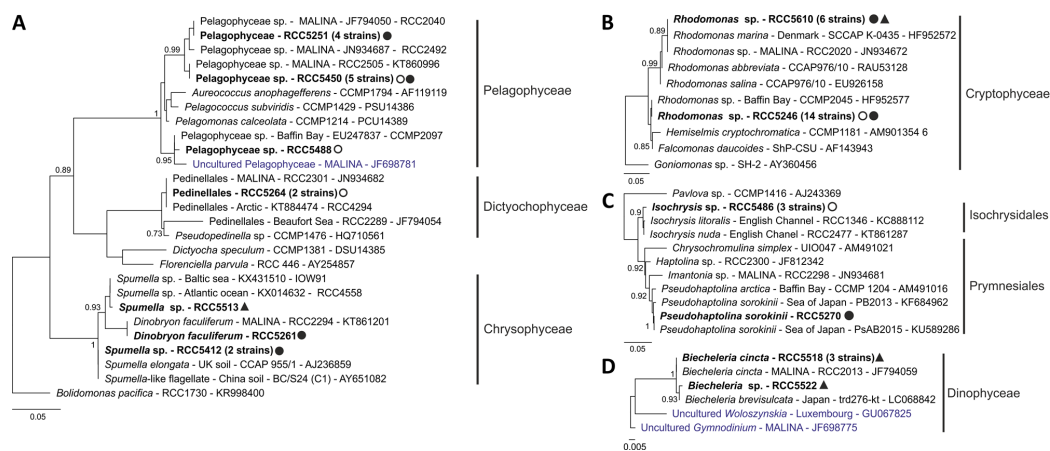

**Figure 6. 18S rRNA phylogenetic tree of other taxonomic groups.**

18S rRNA phylogenetic tree inferred by maximum likelihood (ML) analysis for the strains obtained during the Green Edge campaign (in bold) for: A) Cryptophyta, using an alignment of 15 sequences with 638 positions; B) Heterokontophyta division, alignment of 41 sequences with 396 positions; C) Haptophyta, using an alignment of 15 sequences with 375 positions and D) Dinophyta, alignment of 7 sequences with 300 positions. Legend as in Figure 4.

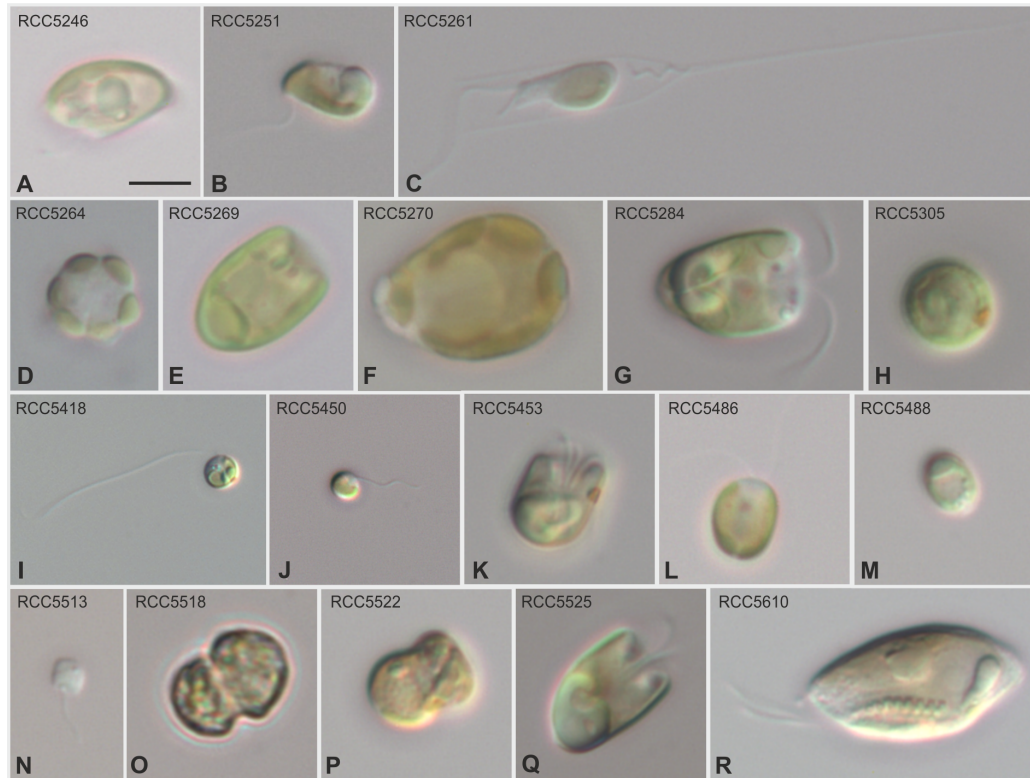

**Figure 7. Light microscopy images of flagellate strains.**

Light microscopy of selected strains of flagellates obtained during Green Edge 2016 campaign. Size bars correspond to  $5 \mu\text{m}$ . **A)** *Rhodomonas* sp. strain RCC5246; **B)** Pelagophyceae strain RCC5251; **C)** *Dinobryon faculiferum* strain RCC5261; **D)** Pedinellales RCC5264 cell showing a ring of six peripheral chloroplasts; **E)** *Pyramimonas australis* strain RCC5269; **F)** *Pseudohaptolina sorokinii* RCC5270; **G)** *Pyramimonas* sp. strain RCC5284; **H)** *Chlamydomonas* sp. strain RCC5305; **I)** *Mantoniella baffinensis* strain RCC5418 with a long flagellum and visible eyespot; **J)** Pelagophyceae strain RCC5450; **K)** *Pyramimonas* sp. strain RCC5453; **L)** *Isochrysis* sp. strain RCC5486; **M)** Pelagophyceae strain RCC5488; **N)** *Spumella* sp. strain RCC5513; **O)** *Biecheleria cincta* strain RCC5518; **P)** *Biecheleria* sp. strain RCC5522; **Q)** *Pyramimonas* sp. strain RCC5525; **R)** *Rhodomonas* sp. RCC5610.

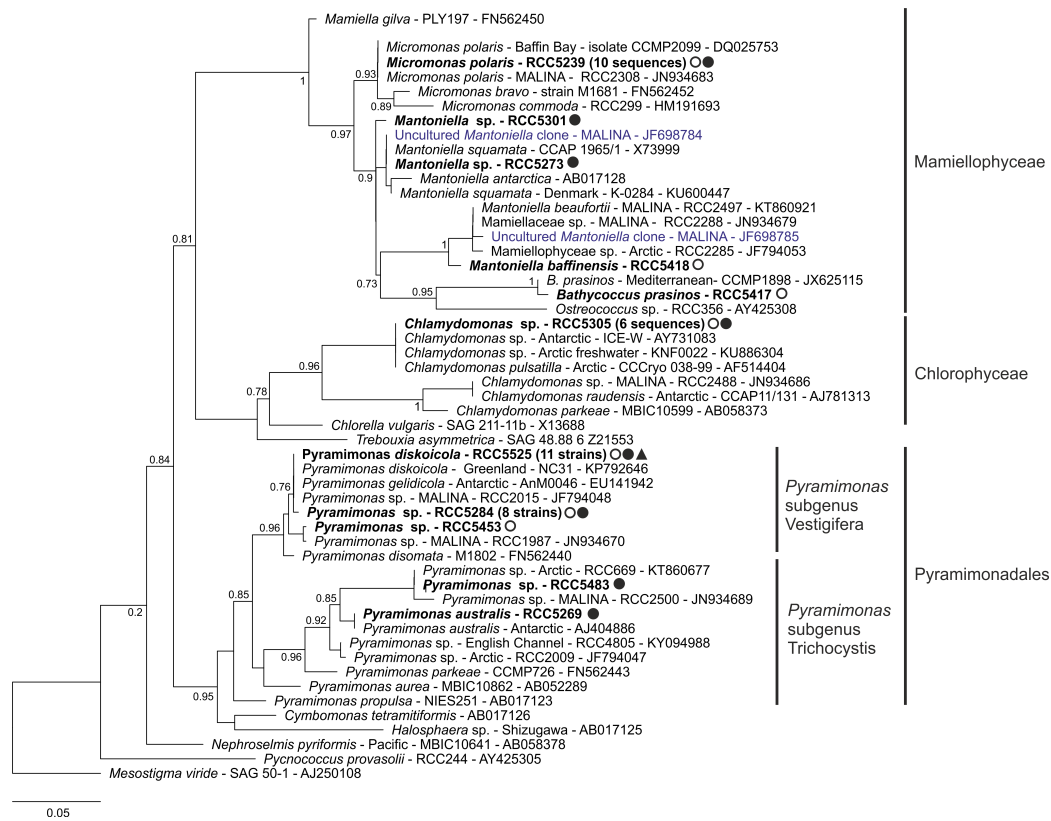

**Figure 8. 18S rRNA phylogenetic tree of Chlorophyta.**

18S rRNA phylogenetic tree inferred by maximum likelihood (ML) analysis for the Chlorophyta strains. Legend is the same as in Figure 4, using an alignment of 70 sequences with 360 positions.

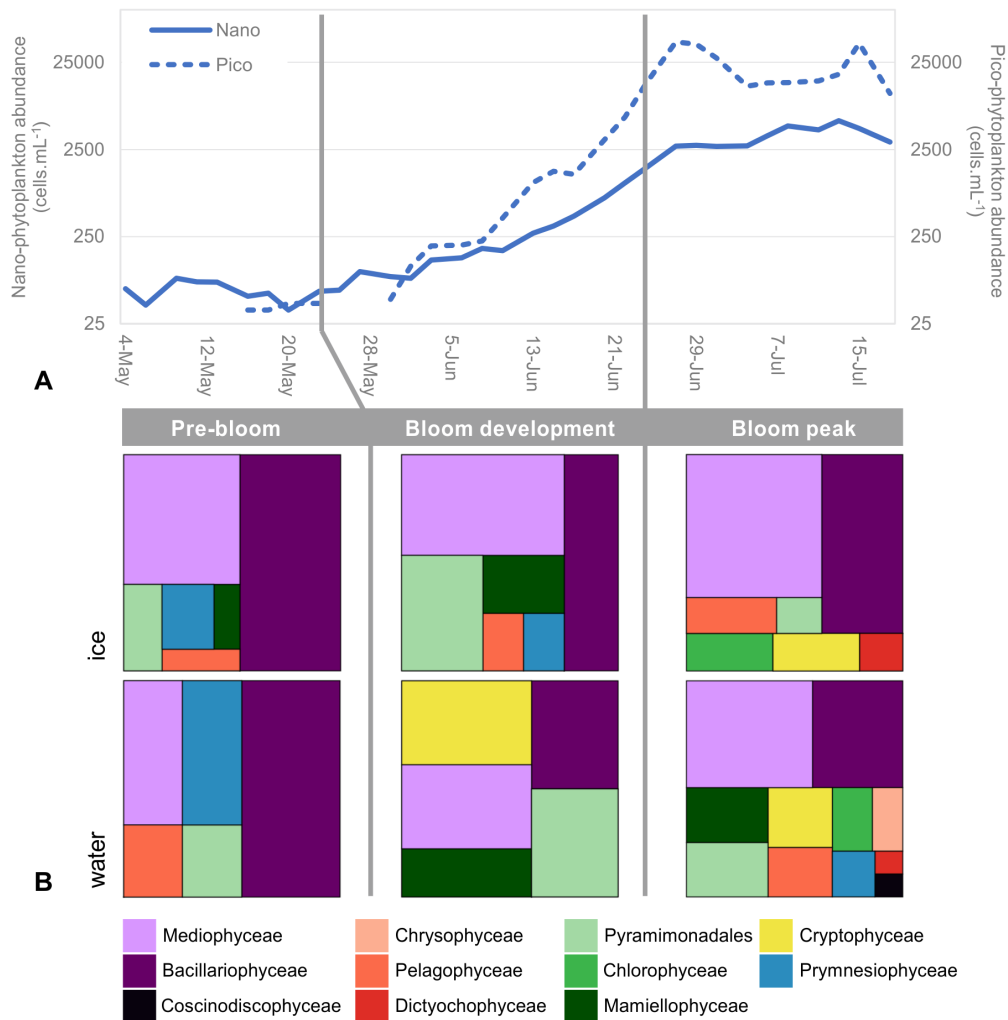

**Figure 9. Evolution of culture diversity during the bloom.**

**A)** Abundance of pico- (dashed line, right axis) and nano-phytoplankton (solid lines, left axis) measured by flow cytometry at 10 m depth at the Ice Camp location. Phases of the bloom: pre-bloom (May 4 to 23), bloom-development (May 24 to June 22) and bloom-peak (June 23 to July 18). **B)** Treemaps showing the distribution of strains by class during the different phases of the bloom for the water and ice samples.



1228 **Supplementary material**

1229 Supplementary data are available on GitHub at <https://github.com/vaulot/Paper-2019->  
1230 Ribeiro-GE-cultures

1231       Supplementary Data S1: File GE\_cultures\_Tables.xlsx. Sheet Data S1. Strains col-  
1232 lected during GE campaign, including both Amundsen an Ice Camp samples: RCC and  
1233 GenBank accession number, taxonomy, respective clusters, sampling substrate, depth and  
1234 date, geographic coordinates and isolation method.

1235       Supplementary Data S2: File GE\_cultures\_Tables.xlsx. Sheet Data S2. Best BLAST  
1236 hit for representative 18S rRNA sequences from each genotype against all GenBank se-  
1237 quences, PR<sup>2</sup> sequences Guillou et al. (2013) and sequences from cultured strains.

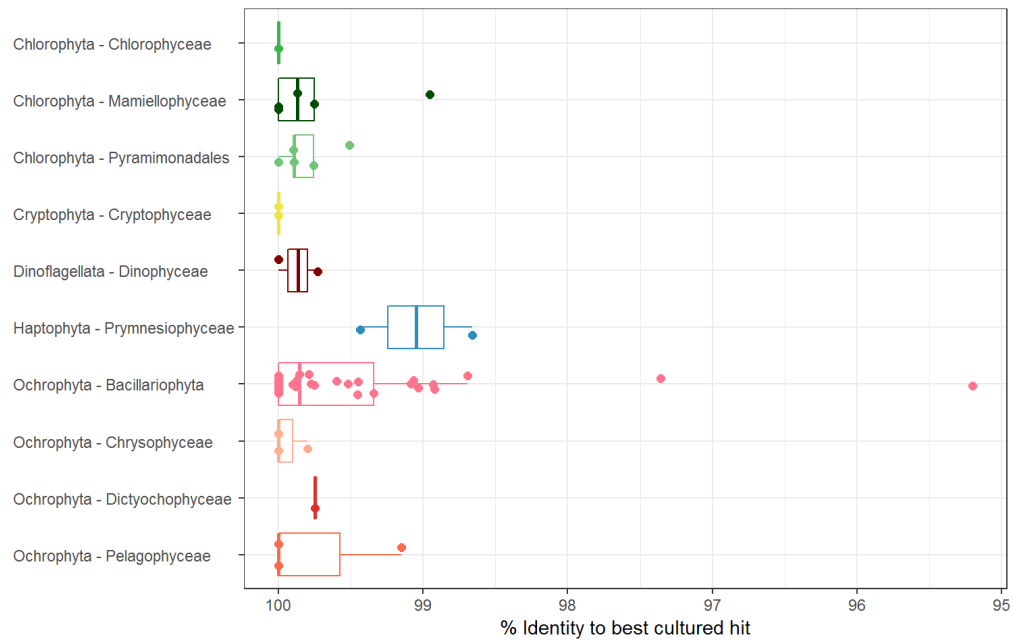

**Figure S1. Novelty of genotypes.**

Percentage of similarity of genotype representative 18S rRNA sequence to best BLAST hit from GenBank (see Supplementary Data S2).

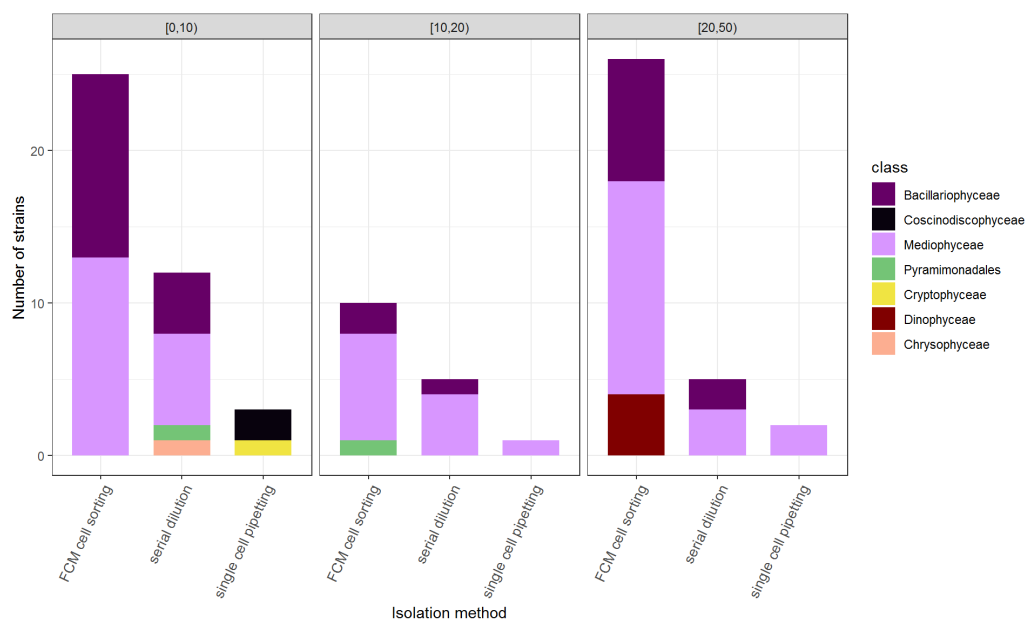

**Figure S2. Strains from Amundsen cruise as a function of isolation method and depth.**

Strain class distribution for the Amundsen cruise separated according to the method of isolation (cell sorting, serial dilution and single cell isolation) and sampling depth range.

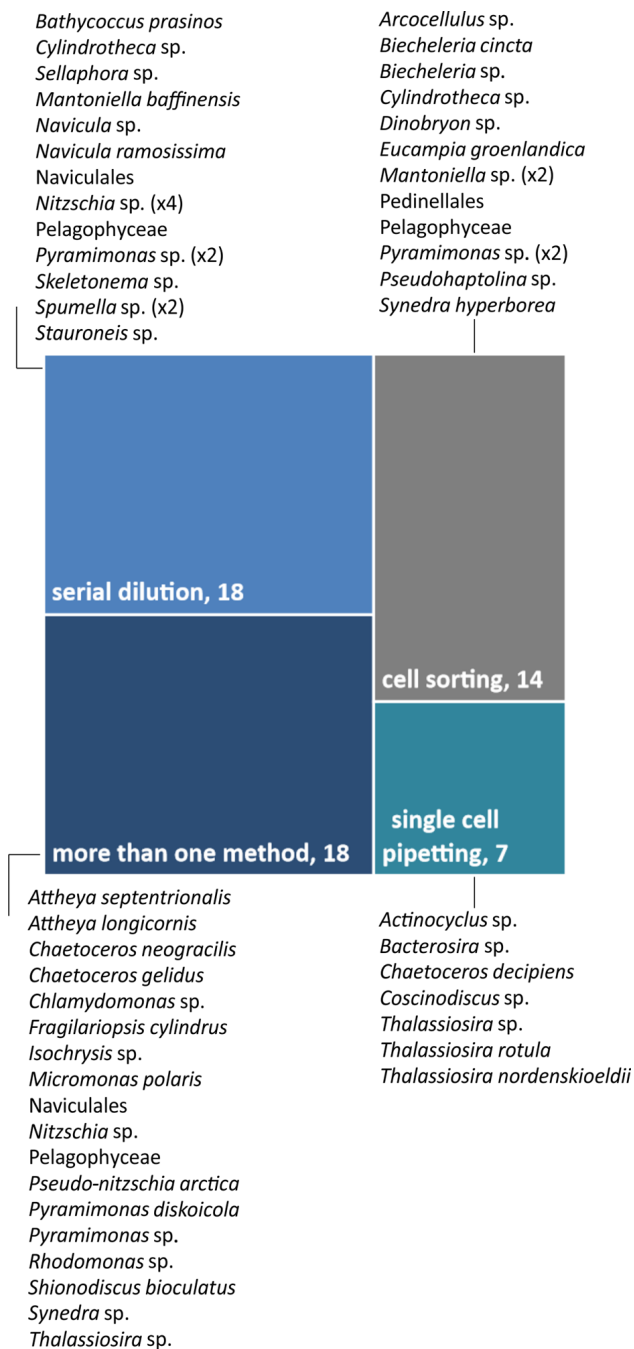

**Figure S3. Genotype as a function of isolation method.**

Treemap of the number of strains isolated as function of the isolation method.

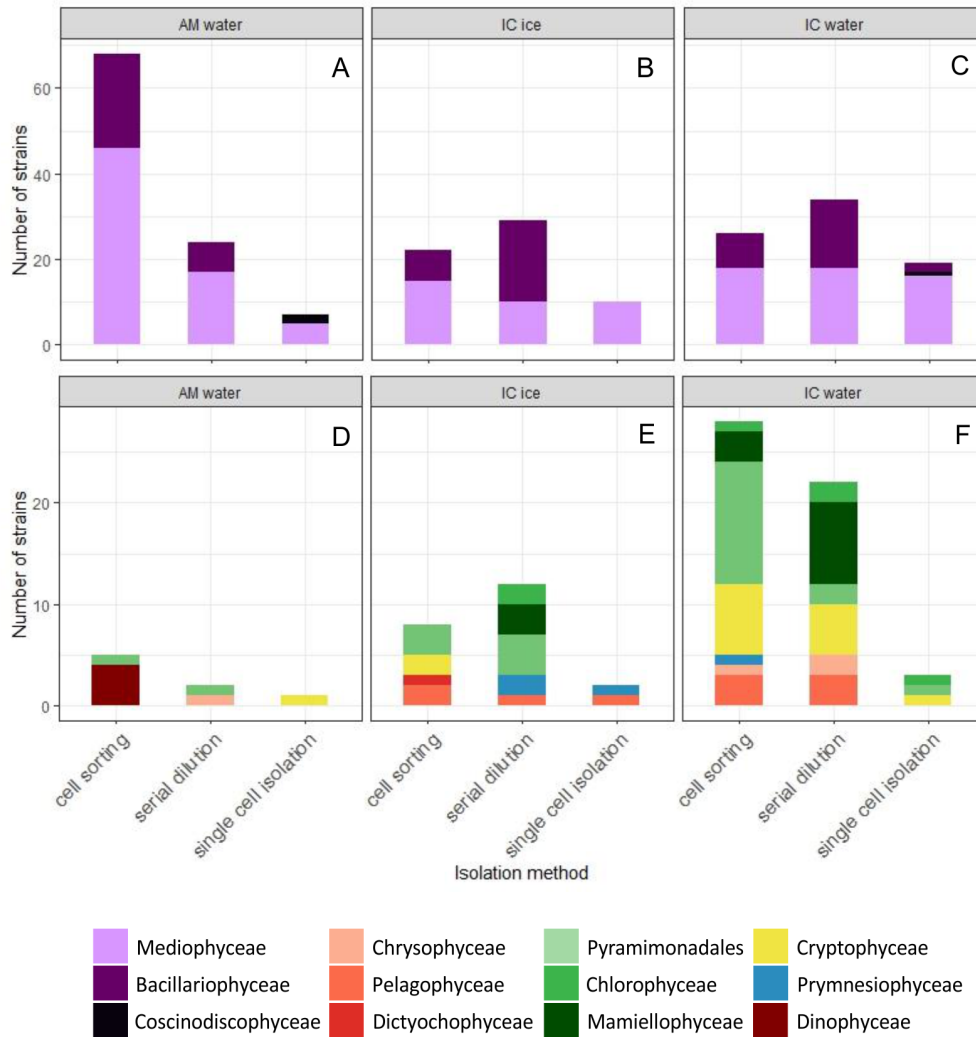

**Figure S4. Strains as a function of isolation method and substrate.**

Strains class distribution separated according to the method of isolation (cell sorting, serial dilution and single cell isolation) and sampling substrate: water samples from the Amundsen cruise, and water and ice samples from the Ice Camp for diatoms (top panels) and non-diatoms (bottom panels).
